# Supplementary material
Source: publisher figshare collection journal article supplement (https://acs.figshare.com/ndownloader/files/5338033)
Supplement: Supplementary file 1 [file 5338033]

 data_global
#============================================================================ 
 
_audit_creation_method            SHELXL-97 
_chemical_name_systematic 
; 
;
#
#-------------------------------------------------------------------------
# 1. SUBMISSION DETAILS
#
_publ_contact_author_name              'Daran, Jean-Claude'
_publ_contact_author_address
;
Laboratoire de Chimie de Coordination
UPR-CNRS 8241
205, route de Narbonne
31077 Toulouse cedex, France
;
_publ_contact_author_phone                      ' (33) 5 61 33 31 74 '
_publ_contact_author_fax                        ' (33) 5 61 55 30 03 '
_publ_contact_author_email                    ' daran@lcc-toulouse.fr '
_publ_requested_journal                  ''
_publ_requested_category          ?
_publ_requested_coeditor_name     ?

_publ_contact_letter
;
;
#============================================================================
# 2. PROCESSING SUMMARY  (IUCr Office Use Only)

_journal_date_recd_electronic      ?
_journal_date_to_coeditor         ?
_journal_date_from_coeditor       ?
_journal_date_accepted     ?
_journal_date_printers_first      ?
_journal_date_printers_final      ?
_journal_date_proofs_out          ?
_journal_date_proofs_in           ?
_journal_coeditor_name            ?
_journal_coeditor_code      ?
_journal_paper_category      ?
_journal_coeditor_notes           ?
_journal_techeditor_code      ?
_iucr_compatibility_tag          ACTA95
_journal_techeditor_notes
;

;
_journal_coden_ASTM               ?
_journal_name_full                ?
_journal_year                     ?
_journal_volume                   ?
_journal_issue                    ?
_journal_page_first               ?
_journal_page_last                ?
_journal_suppl_publ_number        ?
_journal_suppl_publ_pages         ?

#============================================================================
# 2. TITLE AND AUTHOR LIST
_publ_section_title
;
Synthesis and characterization of Pd(I) phosphine carbonyl and hydride 
complexes implicated in the palladium-catalyzed oxo process.
;
loop_
_publ_author_name
_publ_author_address

'Miguel Baya'                               
;
Laboratoire de Chimie de Coordination
UPR-CNRS 8241
205, route de Narbonne
31077 Toulouse cedex, France   
;
'Jennifer Houghton'                               
;
Laboratoire de Chimie de Coordination
UPR-CNRS 8241
205, route de Narbonne
31077 Toulouse cedex, France   
;

'Jean-Claude Daran'                               
;
Laboratoire de Chimie de Coordination
UPR-CNRS 8241
205, route de Narbonne
31077 Toulouse cedex, France   
;

'Rinaldo Poli'                               
;
Laboratoire de Chimie de Coordination
UPR-CNRS 8241
205, route de Narbonne
31077 Toulouse cedex, France   
;

'Denes Konya'               
;
Shell Research and Technology Centre Amsterdam, 
Badhuisweg 3, NL-1031 CM. Amsterdam, Netherlands.  
;
'Karina Almeida'
;
Shell Research and Technology Centre Amsterdam, 
Badhuisweg 3, NL-1031 CM. Amsterdam, Netherlands. 
;
'Lodewijk Schoon'
;
Shell Research and Technology Centre Amsterdam, 
Badhuisweg 3, NL-1031 CM. Amsterdam, Netherlands. 
;
'Wilhelmus P. Mul'
;
Shell Research and Technology Centre Amsterdam, 
Badhuisweg 3, NL-1031 CM. Amsterdam, Netherlands. 
;
' A. Bart van Oort'
;
Shell Research and Technology Centre Amsterdam, 
Badhuisweg 3, NL-1031 CM. Amsterdam, Netherlands. 
;
'Nicholas Meijboom'
;
Shell Research and Technology Centre Amsterdam, 
Badhuisweg 3, NL-1031 CM. Amsterdam, Netherlands. 
;
'Eite Drent'
;
Shell Research and Technology Centre Amsterdam, 
Badhuisweg 3, NL-1031 CM. Amsterdam, Netherlands. 
;
'A. Guy Orpen'
;
School of Chemistry, University of Bristol, Cantock?s Close, 
Bristol, UK BS8 1TS.
;

#============================================================================
_publ_section_exptl_refinement
;
All H atoms were positioned geometrically and treated as riding on
their parent atoms with C-H = 0.93\%A (C~aromatic~), 0.96\%A (C~methyl~) and 
O-H= 0.82\%A, and with U~iso~(H) = 1.2 U~eq~(C~aromatic~) and 
1.5 U~eq~(C~methyl~, O).
;
 
#==============================================================================
_publ_section_references 
;
Altomare A., Burla M.C., Camalli M., Cascarano G.L., Giacovazzo C. , 
Guagliardi A., Moliterni A.G.G., Polidori G. & Spagna R. (1999) SIR97-
a program for automatic solution of crystal structures by direct methods.  
J. Appl. Cryst. 32, 115-119.

Farrugia, L. J. (1997) ORTEP-3 for Windows, J. Appl. Cryst. 30, 565.
 
Farrugia, L. J. (1999) WinGX, J. Appl. Cryst. 32, 837-838.
 
Flack, H.D. (1983). Acta Cryst. A39, 876-881.

Sheldrick, G.M. (1997) SHELXL97. Program for crystal structure
 refinement. University of G\"ottingen, Germany.

Spek, A.L. (2003). J. Appl. Cryst. 36, 7-13.

Stoe, IPDS Manual. Version 2.93. Stoe & Cie, Darmstadt,2000,
Germany.

Stoe, X-RED, Data Reduction for STADI4 and IPDS, 
Revision 1.08. Stoe & Cie, Darmstadt, 1996, Germany.

;


#======================================================================== 
data_Pd~2~(BCOPE)~2~(CO)~2~](OTf)~2~
 
_audit_creation_method            SHELXL-97
_chemical_name_systematic
;
 ?
;
_chemical_name_common             ?
_chemical_melting_point           ?
_chemical_formula_moiety     'C38 H64 O2 P4 Pd2, 2(C F3 O3 S) '    
_chemical_formula_sum
 'C40 H64 F6 O8 P4 Pd2 S2'
_chemical_compound_source               'synthesis as described'
_chemical_formula_weight          1187.71
 
loop_
 _atom_type_symbol
 _atom_type_description
 _atom_type_scat_dispersion_real
 _atom_type_scat_dispersion_imag
 _atom_type_scat_source
 'C'  'C'   0.0033   0.0016
 'International Tables Vol C Tables 4.2.6.8 and 6.1.1.4'
 'H'  'H'   0.0000   0.0000
 'International Tables Vol C Tables 4.2.6.8 and 6.1.1.4'
 'O'  'O'   0.0106   0.0060
 'International Tables Vol C Tables 4.2.6.8 and 6.1.1.4'
 'F'  'F'   0.0171   0.0103
 'International Tables Vol C Tables 4.2.6.8 and 6.1.1.4'
 'P'  'P'   0.1023   0.0942
 'International Tables Vol C Tables 4.2.6.8 and 6.1.1.4'
 'S'  'S'   0.1246   0.1234
 'International Tables Vol C Tables 4.2.6.8 and 6.1.1.4'
 'Pd'  'Pd'  -0.9988   1.0072
 'International Tables Vol C Tables 4.2.6.8 and 6.1.1.4'
 
_symmetry_cell_setting                  monoclinic
_symmetry_space_group_name_H-M          'P 1 21/c 1'
_symmetry_space_group_name_Hall         '-P 2ybc'
_symmetry_Int_Tables_number             14 
 
loop_
 _symmetry_equiv_pos_as_xyz
 'x, y, z'
 '-x, y+1/2, -z+1/2'
 '-x, -y, -z'
 'x, -y-1/2, z-1/2'
 
_cell_length_a                    17.3241(6)
_cell_length_b                    13.0746(6)
_cell_length_c                    21.2901(8)
_cell_angle_alpha                 90.00
_cell_angle_beta                  100.834(3)
_cell_angle_gamma                 90.00
_cell_volume                      4736.4(3)
_cell_formula_units_Z             4
_cell_measurement_temperature     180(2)
_cell_measurement_reflns_used           17091
_cell_measurement_theta_max             32.1
_cell_measurement_theta_min             2.7
 
_exptl_crystal_description              box
_exptl_crystal_colour                   red-brown
_exptl_crystal_size_max                 0.67
_exptl_crystal_size_mid                 0.53
_exptl_crystal_size_min                 0.38
_exptl_crystal_density_meas       ?
_exptl_crystal_density_diffrn     1.666
_exptl_crystal_density_method     'not measured'
_exptl_crystal_F_000              2424
_exptl_absorpt_coefficient_mu     1.055
_exptl_absorpt_correction_type    multi-scan
_exptl_absorpt_correction_T_min   0.520
_exptl_absorpt_correction_T_max   0.670
_exptl_absorpt_process_details    'ABSPACK (Oxford-Diffraction, 2005)'
 
_exptl_special_details
;
 ?
;
 
_diffrn_ambient_temperature       180(2)
_diffrn_radiation_wavelength      0.71073
_diffrn_radiation_type            MoK\a
_diffrn_radiation_source          'fine-focus sealed tube'
_diffrn_radiation_monochromator   graphite
_diffrn_measurement_device_type   'Oxford-Diffraction XCALIBUR'
_diffrn_measurement_method        '\w and \f'
_diffrn_detector_area_resol_mean  8.2632
_diffrn_standards_number          ?
_diffrn_standards_interval_count  ?
_diffrn_standards_interval_time   ?
_diffrn_standards_decay_%         ?
_diffrn_reflns_number             33348
_diffrn_reflns_av_R_equivalents   0.0288
_diffrn_reflns_av_sigmaI/netI     0.0222
_diffrn_reflns_limit_h_min        -21
_diffrn_reflns_limit_h_max        21
_diffrn_reflns_limit_k_min        -16
_diffrn_reflns_limit_k_max        12
_diffrn_reflns_limit_l_min        -26
_diffrn_reflns_limit_l_max        26
_diffrn_reflns_theta_min          3.16
_diffrn_reflns_theta_max          26.37
_reflns_number_total              9655
_reflns_number_gt                 8374
_reflns_threshold_expression      >2\s(I)
_diffrn_orient_matrix_UB_11      -0.0308154265
_diffrn_orient_matrix_UB_12      -0.0124057781
_diffrn_orient_matrix_UB_13       0.0163930744
_diffrn_orient_matrix_UB_21      -0.0279738425
_diffrn_orient_matrix_UB_22       0.0178216973
_diffrn_orient_matrix_UB_23      -0.0264112851
_diffrn_orient_matrix_UB_31      -0.0023656697
_diffrn_orient_matrix_UB_32      -0.0497146889
_diffrn_orient_matrix_UB_33      -0.0135761919
_diffrn_measurement_details
;
#__ type_ start__ end____ width___ exp.time_
  1 omega  -54.00   61.00   1.0000   20.0000
omega____ theta____ kappa____ phi______ omega'___ theta'___ frames
    -       30.0000  -79.0000    0.0000    0.0000    0.0000 115

#__ type_ start__ end____ width___ exp.time_
  2 omega  -54.00   61.00   1.0000   20.0000
omega____ theta____ kappa____ phi______ omega'___ theta'___ frames
    -       30.0000  -79.0000   90.0000    0.0000    0.0000 115

#__ type_ start__ end____ width___ exp.time_
  3 omega  -54.00   61.00   1.0000   20.0000
omega____ theta____ kappa____ phi______ omega'___ theta'___ frames
    -       30.0000  -79.0000  180.0000    0.0000    0.0000 115

#__ type_ start__ end____ width___ exp.time_
  4 omega  -54.00   35.00   1.0000   20.0000
omega____ theta____ kappa____ phi______ omega'___ theta'___ frames
    -       30.0000  -79.0000  270.0000    0.0000    0.0000 89

;

 
_computing_data_collection
;
CrysAlis CCD, Version 1.170.32 (Oxford Diffraction, 2003)
;
_computing_cell_refinement
;
CrysAlis RED, Version 1.170.32 (Oxford Diffraction, 2003)

;
_computing_data_reduction     'CrysAlis RED'
_computing_structure_solution           'SIR-97 (Altomare et al., 1997)'
_computing_structure_refinement         'SHELXL-97 (Sheldrick, 1997)'
_computing_molecular_graphics           'Ortep-3 for Windows (Farrugia, 1997)'
_computing_publication_material
                                   'WinGX publication routines (Farrugia, 1999)'
 
_refine_special_details
;
 Refinement of F^2^ against ALL reflections.  The weighted R-factor wR and
 goodness of fit S are based on F^2^, conventional R-factors R are based
 on F, with F set to zero for negative F^2^. The threshold expression of
 F^2^ > 2sigma(F^2^) is used only for calculating R-factors(gt) etc. and is
 not relevant to the choice of reflections for refinement.  R-factors based
 on F^2^ are statistically about twice as large as those based on F, and R-
 factors based on ALL data will be even larger.
;
 
_refine_ls_structure_factor_coef  Fsqd
_refine_ls_matrix_type            full
_refine_ls_weighting_scheme       calc
_refine_ls_weighting_details
 'calc w=1/[\s^2^(Fo^2^)+(0.0447P)^2^+22.5222P] where P=(Fo^2^+2Fc^2^)/3'
_atom_sites_solution_primary      direct
_atom_sites_solution_secondary    difmap
_atom_sites_solution_hydrogens    geom
_refine_ls_hydrogen_treatment     constr
_refine_ls_extinction_method      none
_refine_ls_extinction_coef        ?
_refine_ls_number_reflns          9655
_refine_ls_number_parameters      577
_refine_ls_number_restraints      5
_refine_ls_R_factor_all           0.0577
_refine_ls_R_factor_gt            0.0509
_refine_ls_wR_factor_ref          0.1203
_refine_ls_wR_factor_gt           0.1150
_refine_ls_goodness_of_fit_ref    1.080
_refine_ls_restrained_S_all       1.082
_refine_ls_shift/su_max           0.002
_refine_ls_shift/su_mean          0.000
 
loop_
 _atom_site_label
 _atom_site_type_symbol
 _atom_site_fract_x
 _atom_site_fract_y
 _atom_site_fract_z
 _atom_site_U_iso_or_equiv
 _atom_site_adp_type
 _atom_site_occupancy
 _atom_site_symmetry_multiplicity
 _atom_site_calc_flag
 _atom_site_refinement_flags
 _atom_site_disorder_assembly
 _atom_site_disorder_group
Pd1 Pd 0.376980(17) 0.25843(2) 0.802891(15) 0.02156(9) Uani 1 1 d . A .
Pd2 Pd 0.241206(17) 0.18891(2) 0.744522(14) 0.02209(9) Uani 1 1 d . . .
P1 P 0.50228(6) 0.31423(9) 0.85181(6) 0.0298(3) Uani 1 1 d D . .
C11 C 0.4847(4) 0.4551(6) 0.8570(5) 0.0299(17) Uani 0.58 1 d PD A 1
H11A H 0.5319 0.4893 0.8815 0.036 Uiso 0.58 1 calc PR A 1
H11B H 0.4727 0.4855 0.8136 0.036 Uiso 0.58 1 calc PR A 1
C21 C 0.4158(4) 0.4683(6) 0.8904(4) 0.0277(16) Uani 0.58 1 d PD A 1
H21A H 0.4058 0.5419 0.8965 0.033 Uiso 0.58 1 calc PR A 1
H21B H 0.4269 0.4350 0.9329 0.033 Uiso 0.58 1 calc PR A 1
P2 P 0.33120(7) 0.40976(9) 0.84063(6) 0.0309(3) Uani 1 1 d D . .
C11A C 0.4913(6) 0.4304(8) 0.8970(6) 0.031(2) Uani 0.42 1 d PD A 2
H11C H 0.4775 0.4135 0.9388 0.037 Uiso 0.42 1 calc PR A 2
H11D H 0.5406 0.4707 0.9043 0.037 Uiso 0.42 1 calc PR A 2
C21A C 0.4252(5) 0.4895(7) 0.8554(6) 0.029(2) Uani 0.42 1 d PD A 2
H21C H 0.4403 0.5064 0.8140 0.035 Uiso 0.42 1 calc PR A 2
H21D H 0.4159 0.5543 0.8768 0.035 Uiso 0.42 1 calc PR A 2
P3 P 0.20523(6) 0.08701(8) 0.82334(5) 0.0232(2) Uani 1 1 d . . .
P4 P 0.11789(6) 0.14235(9) 0.68614(5) 0.0231(2) Uani 1 1 d . . .
C1 C 0.4054(2) 0.1304(4) 0.7687(2) 0.0280(9) Uani 1 1 d . . .
O1 O 0.4281(2) 0.0566(3) 0.75329(18) 0.0418(8) Uani 1 1 d . A .
C2 C 0.2787(3) 0.2863(4) 0.6886(2) 0.0329(10) Uani 1 1 d . . .
O2 O 0.2946(2) 0.3495(3) 0.65763(17) 0.0423(8) Uani 1 1 d . . .
C31 C 0.0988(3) 0.1033(4) 0.8096(2) 0.0323(10) Uani 1 1 d . . .
H31A H 0.0760 0.0588 0.8390 0.039 Uiso 1 1 calc R . .
H31B H 0.0857 0.1752 0.8178 0.039 Uiso 1 1 calc R . .
C41 C 0.0652(3) 0.0748(4) 0.7404(2) 0.0358(11) Uani 1 1 d . . .
H41A H 0.0088 0.0930 0.7302 0.043 Uiso 1 1 calc R . .
H41B H 0.0700 0.0001 0.7347 0.043 Uiso 1 1 calc R . .
C111 C 0.5869(3) 0.3106(4) 0.8117(2) 0.0335(10) Uani 1 1 d . A .
H111 H 0.5723 0.3475 0.7701 0.040 Uiso 1 1 calc R . .
C112 C 0.6566(3) 0.3663(4) 0.8520(3) 0.0419(12) Uani 1 1 d . . .
H11E H 0.7012 0.3636 0.8290 0.050 Uiso 1 1 calc R A .
H11F H 0.6422 0.4391 0.8552 0.050 Uiso 1 1 calc R . .
C113 C 0.6845(3) 0.3255(6) 0.9191(3) 0.065(2) Uani 1 1 d . A .
H11G H 0.7220 0.3752 0.9431 0.078 Uiso 1 1 calc R . .
H11H H 0.7134 0.2609 0.9162 0.078 Uiso 1 1 calc R . .
C114 C 0.6186(4) 0.3050(9) 0.9577(3) 0.099(4) Uani 1 1 d . . .
H11I H 0.6415 0.2662 0.9967 0.119 Uiso 1 1 calc R A .
H11J H 0.6003 0.3715 0.9715 0.119 Uiso 1 1 calc R . .
C115 C 0.5468(4) 0.2459(7) 0.9220(3) 0.068(2) Uani 1 1 d . A .
H115 H 0.5076 0.2421 0.9508 0.082 Uiso 1 1 calc R . .
C116 C 0.5627(4) 0.1373(7) 0.9023(4) 0.082(3) Uani 1 1 d . . .
H11K H 0.5859 0.0986 0.9413 0.099 Uiso 1 1 calc R A .
H11L H 0.5116 0.1049 0.8843 0.099 Uiso 1 1 calc R . .
C117 C 0.6160(4) 0.1257(5) 0.8544(5) 0.082(3) Uani 1 1 d . A .
H11M H 0.6104 0.0551 0.8373 0.098 Uiso 1 1 calc R . .
H11N H 0.6709 0.1338 0.8772 0.098 Uiso 1 1 calc R . .
C118 C 0.6023(3) 0.1999(5) 0.7975(3) 0.0517(16) Uani 1 1 d . . .
H11O H 0.6491 0.1974 0.7770 0.062 Uiso 1 1 calc R A .
H11P H 0.5571 0.1745 0.7658 0.062 Uiso 1 1 calc R . .
C211 C 0.2681(4) 0.4065(4) 0.9007(2) 0.0488(15) Uani 1 1 d . A .
H211 H 0.2912 0.3566 0.9347 0.059 Uiso 1 1 calc R . .
C212 C 0.2691(5) 0.5133(4) 0.9318(3) 0.0587(18) Uani 1 1 d . . .
H21E H 0.2331 0.5116 0.9628 0.070 Uiso 1 1 calc R A .
H21F H 0.3227 0.5256 0.9564 0.070 Uiso 1 1 calc R . .
C213 C 0.2462(3) 0.6048(4) 0.8873(2) 0.0392(11) Uani 1 1 d . A .
H21G H 0.2676 0.6672 0.9106 0.047 Uiso 1 1 calc R . .
H21H H 0.1882 0.6108 0.8793 0.047 Uiso 1 1 calc R . .
C214 C 0.2722(3) 0.6051(3) 0.8222(2) 0.0335(10) Uani 1 1 d . . .
H21I H 0.3263 0.6327 0.8283 0.040 Uiso 1 1 calc R A .
H21J H 0.2377 0.6528 0.7935 0.040 Uiso 1 1 calc R . .
C215 C 0.2709(3) 0.5011(3) 0.7882(2) 0.0281(9) Uani 1 1 d . A .
H215 H 0.2951 0.5107 0.7495 0.034 Uiso 1 1 calc R . .
C216 C 0.1880(3) 0.4582(4) 0.7660(2) 0.0346(10) Uani 1 1 d . . .
H21K H 0.1574 0.5083 0.7365 0.041 Uiso 1 1 calc R A .
H21L H 0.1922 0.3950 0.7413 0.041 Uiso 1 1 calc R . .
C217 C 0.1424(3) 0.4337(4) 0.8174(3) 0.0456(13) Uani 1 1 d . A .
H21M H 0.0935 0.3977 0.7980 0.055 Uiso 1 1 calc R . .
H21N H 0.1274 0.4985 0.8360 0.055 Uiso 1 1 calc R . .
C218 C 0.1869(4) 0.3687(4) 0.8702(3) 0.0537(16) Uani 1 1 d . . .
H21O H 0.1923 0.2992 0.8530 0.064 Uiso 1 1 calc R A .
H21P H 0.1550 0.3625 0.9041 0.064 Uiso 1 1 calc R . .
C311 C 0.2212(3) -0.0511(3) 0.8175(2) 0.0350(10) Uani 1 1 d . . .
H311 H 0.2009 -0.0722 0.7723 0.042 Uiso 1 1 calc R . .
C312 C 0.1738(3) -0.1083(4) 0.8604(3) 0.0426(12) Uani 1 1 d . . .
H31C H 0.1173 -0.0942 0.8446 0.051 Uiso 1 1 calc R . .
H31D H 0.1819 -0.1826 0.8554 0.051 Uiso 1 1 calc R . .
C313 C 0.1929(4) -0.0827(4) 0.9315(3) 0.0508(14) Uani 1 1 d . . .
H31E H 0.2438 -0.1147 0.9502 0.061 Uiso 1 1 calc R . .
H31F H 0.1522 -0.1139 0.9524 0.061 Uiso 1 1 calc R . .
C314 C 0.1978(4) 0.0328(4) 0.9477(2) 0.0457(13) Uani 1 1 d . . .
H31G H 0.2209 0.0404 0.9936 0.055 Uiso 1 1 calc R . .
H31H H 0.1437 0.0604 0.9411 0.055 Uiso 1 1 calc R . .
C315 C 0.2463(3) 0.0990(4) 0.9087(2) 0.0329(10) Uani 1 1 d . . .
H315 H 0.2417 0.1722 0.9213 0.039 Uiso 1 1 calc R . .
C316 C 0.3333(3) 0.0722(4) 0.9178(3) 0.0446(13) Uani 1 1 d . . .
H31I H 0.3591 0.1239 0.8947 0.054 Uiso 1 1 calc R . .
H31J H 0.3562 0.0789 0.9638 0.054 Uiso 1 1 calc R . .
C317 C 0.3544(3) -0.0331(5) 0.8958(3) 0.0587(17) Uani 1 1 d . . .
H31K H 0.4109 -0.0326 0.8935 0.070 Uiso 1 1 calc R . .
H31L H 0.3475 -0.0830 0.9293 0.070 Uiso 1 1 calc R . .
C318 C 0.3092(3) -0.0719(4) 0.8324(3) 0.0510(14) Uani 1 1 d . . .
H31M H 0.3171 -0.1468 0.8308 0.061 Uiso 1 1 calc R . .
H31N H 0.3328 -0.0413 0.7979 0.061 Uiso 1 1 calc R . .
C411 C 0.0537(3) 0.2439(4) 0.6456(2) 0.0334(10) Uani 1 1 d . . .
H411 H 0.0466 0.2964 0.6782 0.040 Uiso 1 1 calc R . .
C412 C 0.0959(3) 0.2948(4) 0.5964(3) 0.0478(14) Uani 1 1 d . . .
H41C H 0.0607 0.3481 0.5737 0.057 Uiso 1 1 calc R . .
H41D H 0.1432 0.3299 0.6200 0.057 Uiso 1 1 calc R . .
C413 C 0.1214(4) 0.2252(5) 0.5462(3) 0.0528(15) Uani 1 1 d . . .
H41E H 0.0751 0.2129 0.5120 0.063 Uiso 1 1 calc R . .
H41F H 0.1607 0.2626 0.5268 0.063 Uiso 1 1 calc R . .
C414 C 0.1562(3) 0.1221(5) 0.5692(2) 0.0456(13) Uani 1 1 d . . .
H41G H 0.2118 0.1328 0.5896 0.055 Uiso 1 1 calc R . .
H41H H 0.1559 0.0783 0.5312 0.055 Uiso 1 1 calc R . .
C415 C 0.1160(3) 0.0635(4) 0.6160(2) 0.0310(9) Uani 1 1 d . . .
H415 H 0.1482 0.0011 0.6296 0.037 Uiso 1 1 calc R . .
C416 C 0.0311(3) 0.0282(4) 0.5902(2) 0.0348(10) Uani 1 1 d . . .
H41I H 0.0316 -0.0181 0.5535 0.042 Uiso 1 1 calc R . .
H41J H 0.0128 -0.0120 0.6240 0.042 Uiso 1 1 calc R . .
C417 C -0.0283(3) 0.1133(4) 0.5688(2) 0.0372(11) Uani 1 1 d . . .
H41K H -0.0816 0.0830 0.5602 0.045 Uiso 1 1 calc R . .
H41L H -0.0182 0.1419 0.5281 0.045 Uiso 1 1 calc R . .
C418 C -0.0273(3) 0.2008(4) 0.6164(2) 0.0391(11) Uani 1 1 d . . .
H41M H -0.0527 0.1766 0.6517 0.047 Uiso 1 1 calc R . .
H41N H -0.0599 0.2572 0.5946 0.047 Uiso 1 1 calc R . .
S1 S -0.09352(9) 0.25185(10) 0.82030(8) 0.0492(3) Uani 1 1 d . . .
O11 O -0.1561(4) 0.3204(5) 0.8166(3) 0.105(2) Uani 1 1 d . . .
O12 O -0.0921(3) 0.1812(4) 0.7710(2) 0.0687(13) Uani 1 1 d . . .
O13 O -0.0171(4) 0.2964(5) 0.8428(5) 0.136(3) Uani 1 1 d . . .
C5 C -0.1019(4) 0.1738(7) 0.8886(3) 0.072(2) Uani 1 1 d . . .
F51 F -0.0482(4) 0.1025(6) 0.8987(3) 0.150(3) Uani 1 1 d . . .
F52 F -0.1040(4) 0.2279(6) 0.9394(2) 0.128(2) Uani 1 1 d . . .
F53 F -0.1698(3) 0.1226(4) 0.8770(3) 0.115(2) Uani 1 1 d . . .
S2 S 0.39396(8) 0.19359(9) 0.57007(6) 0.0352(3) Uani 1 1 d . . .
O21 O 0.3797(3) 0.1483(3) 0.62780(18) 0.0525(10) Uani 1 1 d . . .
O22 O 0.3311(2) 0.2547(3) 0.53661(18) 0.0476(9) Uani 1 1 d . . .
O23 O 0.4313(3) 0.1276(3) 0.53111(19) 0.0623(12) Uani 1 1 d . . .
C6 C 0.4707(3) 0.2866(5) 0.5983(3) 0.0432(12) Uani 1 1 d . . .
F61 F 0.4533(2) 0.3487(3) 0.64232(19) 0.0648(10) Uani 1 1 d . . .
F62 F 0.4840(3) 0.3462(4) 0.5504(2) 0.0818(13) Uani 1 1 d . . .
F63 F 0.5372(2) 0.2439(4) 0.6238(2) 0.0858(14) Uani 1 1 d . . .
 
loop_
 _atom_site_aniso_label
 _atom_site_aniso_U_11
 _atom_site_aniso_U_22
 _atom_site_aniso_U_33
 _atom_site_aniso_U_23
 _atom_site_aniso_U_13
 _atom_site_aniso_U_12
Pd1 0.01820(15) 0.02029(16) 0.02587(17) -0.00444(12) 0.00332(12) 0.00090(11)
Pd2 0.02029(16) 0.02282(17) 0.02238(16) -0.00117(12) 0.00204(11) -0.00029(12)
P1 0.0165(5) 0.0296(6) 0.0448(7) -0.0166(5) 0.0097(5) -0.0028(4)
C11 0.019(4) 0.026(4) 0.047(5) -0.007(4) 0.010(4) 0.001(3)
C21 0.027(4) 0.025(4) 0.029(4) -0.006(3) -0.001(3) -0.005(3)
P2 0.0234(5) 0.0236(6) 0.0414(7) -0.0105(5) -0.0053(5) 0.0052(4)
C11A 0.025(5) 0.034(6) 0.031(6) -0.012(5) 0.000(5) -0.006(4)
C21A 0.023(5) 0.013(5) 0.047(7) -0.012(5) -0.004(5) 0.003(4)
P3 0.0258(5) 0.0195(5) 0.0239(5) -0.0021(4) 0.0033(4) -0.0004(4)
P4 0.0201(5) 0.0275(5) 0.0210(5) -0.0019(4) 0.0018(4) 0.0016(4)
C1 0.025(2) 0.032(2) 0.028(2) -0.0013(18) 0.0056(17) -0.0064(18)
O1 0.047(2) 0.0289(18) 0.050(2) -0.0121(16) 0.0114(17) 0.0063(15)
C2 0.028(2) 0.033(2) 0.037(2) -0.001(2) 0.0040(19) 0.0022(19)
O2 0.043(2) 0.043(2) 0.045(2) 0.0089(17) 0.0196(16) -0.0010(16)
C31 0.029(2) 0.038(3) 0.031(2) 0.0013(19) 0.0094(18) 0.0035(19)
C41 0.027(2) 0.047(3) 0.031(2) 0.000(2) 0.0005(18) -0.009(2)
C111 0.024(2) 0.041(3) 0.037(2) 0.002(2) 0.0095(18) -0.0002(19)
C112 0.023(2) 0.042(3) 0.064(3) -0.011(3) 0.017(2) -0.006(2)
C113 0.022(2) 0.108(6) 0.061(4) -0.024(4) -0.003(2) -0.019(3)
C114 0.050(4) 0.209(11) 0.034(3) -0.021(5) -0.002(3) -0.052(5)
C115 0.039(3) 0.139(7) 0.027(3) 0.009(3) 0.004(2) -0.035(4)
C116 0.045(4) 0.098(6) 0.090(5) 0.061(5) -0.024(4) -0.022(4)
C117 0.038(3) 0.036(3) 0.167(9) 0.002(4) 0.008(4) 0.011(3)
C118 0.032(3) 0.059(4) 0.072(4) -0.036(3) 0.027(3) -0.011(2)
C211 0.099(5) 0.024(2) 0.021(2) 0.0030(18) 0.005(3) 0.019(3)
C212 0.112(5) 0.032(3) 0.033(3) -0.007(2) 0.016(3) 0.021(3)
C213 0.052(3) 0.022(2) 0.045(3) -0.007(2) 0.012(2) 0.006(2)
C214 0.035(2) 0.018(2) 0.048(3) 0.0027(19) 0.006(2) -0.0021(18)
C215 0.031(2) 0.026(2) 0.029(2) 0.0027(17) 0.0084(17) 0.0007(17)
C216 0.031(2) 0.028(2) 0.040(3) -0.0008(19) -0.0058(19) 0.0082(19)
C217 0.028(2) 0.032(3) 0.080(4) -0.013(3) 0.020(3) -0.002(2)
C218 0.081(4) 0.024(3) 0.070(4) -0.002(2) 0.051(3) -0.005(3)
C311 0.042(3) 0.020(2) 0.046(3) -0.0048(19) 0.016(2) -0.0044(19)
C312 0.052(3) 0.024(2) 0.051(3) 0.000(2) 0.011(2) -0.013(2)
C313 0.062(4) 0.045(3) 0.045(3) 0.016(3) 0.011(3) -0.012(3)
C314 0.059(3) 0.049(3) 0.028(2) 0.003(2) 0.008(2) -0.009(3)
C315 0.044(3) 0.024(2) 0.027(2) 0.0001(17) -0.0026(19) -0.0040(19)
C316 0.041(3) 0.048(3) 0.038(3) 0.012(2) -0.010(2) -0.011(2)
C317 0.038(3) 0.054(4) 0.080(4) 0.021(3) 0.000(3) 0.007(3)
C318 0.045(3) 0.031(3) 0.082(4) 0.008(3) 0.025(3) 0.014(2)
C411 0.027(2) 0.032(2) 0.036(2) -0.0070(19) -0.0058(18) 0.0027(18)
C412 0.047(3) 0.040(3) 0.050(3) 0.018(2) -0.007(2) -0.003(2)
C413 0.046(3) 0.073(4) 0.040(3) 0.017(3) 0.008(2) -0.011(3)
C414 0.038(3) 0.066(4) 0.035(3) -0.009(3) 0.015(2) -0.002(3)
C415 0.029(2) 0.031(2) 0.033(2) -0.0047(19) 0.0061(18) 0.0054(18)
C416 0.039(3) 0.034(3) 0.030(2) -0.0081(19) 0.0018(19) -0.001(2)
C417 0.029(2) 0.048(3) 0.031(2) -0.008(2) -0.0042(18) -0.003(2)
C418 0.031(2) 0.049(3) 0.036(3) 0.000(2) 0.004(2) 0.011(2)
S1 0.0524(8) 0.0322(7) 0.0690(9) 0.0037(6) 0.0271(7) 0.0055(6)
O11 0.106(4) 0.100(4) 0.123(5) 0.055(4) 0.060(4) 0.074(4)
O12 0.065(3) 0.090(4) 0.055(3) -0.017(2) 0.022(2) -0.007(3)
O13 0.082(4) 0.082(4) 0.269(10) -0.084(5) 0.093(5) -0.052(3)
C5 0.060(4) 0.105(6) 0.054(4) 0.006(4) 0.015(3) 0.028(4)
F51 0.145(5) 0.179(7) 0.141(5) 0.097(5) 0.061(4) 0.099(5)
F52 0.116(4) 0.219(7) 0.051(3) -0.038(4) 0.019(3) -0.006(5)
F53 0.118(4) 0.093(4) 0.158(5) 0.002(4) 0.091(4) -0.033(3)
S2 0.0437(7) 0.0321(6) 0.0287(6) -0.0015(5) 0.0039(5) 0.0031(5)
O21 0.077(3) 0.039(2) 0.044(2) 0.0084(17) 0.018(2) 0.000(2)
O22 0.040(2) 0.049(2) 0.046(2) 0.0045(17) -0.0101(16) 0.0005(17)
O23 0.084(3) 0.059(3) 0.044(2) -0.015(2) 0.014(2) 0.020(2)
C6 0.031(2) 0.057(3) 0.040(3) -0.007(2) 0.005(2) 0.003(2)
F61 0.060(2) 0.063(2) 0.072(2) -0.0328(19) 0.0153(18) -0.0138(18)
F62 0.079(3) 0.102(3) 0.066(2) 0.010(2) 0.018(2) -0.039(3)
F63 0.040(2) 0.090(3) 0.113(4) -0.015(3) -0.022(2) 0.015(2)
 
_geom_special_details
;
 All esds (except the esd in the dihedral angle between two l.s. planes)
 are estimated using the full covariance matrix.  The cell esds are taken
 into account individually in the estimation of esds in distances, angles
 and torsion angles; correlations between esds in cell parameters are only
 used when they are defined by crystal symmetry.  An approximate (isotropic)
 treatment of cell esds is used for estimating esds involving l.s. planes.
;
 
loop_
 _geom_bond_atom_site_label_1
 _geom_bond_atom_site_label_2
 _geom_bond_distance
 _geom_bond_site_symmetry_2
 _geom_bond_publ_flag
Pd1 C1 1.926(5) . ?
Pd1 P2 2.3300(11) . ?
Pd1 P1 2.3407(11) . ?
Pd1 Pd2 2.6085(4) . ?
Pd2 C2 1.937(5) . ?
Pd2 P3 2.3179(11) . ?
Pd2 P4 2.3412(11) . ?
P1 C115 1.787(7) . ?
P1 C11A 1.826(10) . ?
P1 C111 1.831(4) . ?
P1 C11 1.874(7) . ?
C11 C21 1.511(10) . ?
C21 P2 1.809(7) . ?
P2 C215 1.824(4) . ?
P2 C211 1.833(6) . ?
P2 C21A 1.909(10) . ?
C11A C21A 1.521(12) . ?
P3 C31 1.824(5) . ?
P3 C315 1.830(4) . ?
P3 C311 1.834(5) . ?
P4 C415 1.811(5) . ?
P4 C41 1.828(5) . ?
P4 C411 1.840(5) . ?
C1 O1 1.115(6) . ?
C2 O2 1.123(6) . ?
C31 C41 1.526(6) . ?
C111 C118 1.512(7) . ?
C111 C112 1.529(7) . ?
C112 C113 1.515(9) . ?
C113 C114 1.549(9) . ?
C114 C115 1.538(9) . ?
C115 C116 1.520(12) . ?
C116 C117 1.507(12) . ?
C117 C118 1.534(10) . ?
C211 C218 1.517(9) . ?
C211 C212 1.544(7) . ?
C212 C213 1.532(7) . ?
C213 C214 1.534(7) . ?
C214 C215 1.539(6) . ?
C215 C216 1.531(6) . ?
C216 C217 1.499(7) . ?
C217 C218 1.501(9) . ?
C311 C318 1.523(7) . ?
C311 C312 1.532(7) . ?
C312 C313 1.526(8) . ?
C313 C314 1.547(8) . ?
C314 C315 1.551(7) . ?
C315 C316 1.524(7) . ?
C316 C317 1.521(9) . ?
C317 C318 1.515(9) . ?
C411 C418 1.532(7) . ?
C411 C412 1.536(7) . ?
C412 C413 1.530(9) . ?
C413 C414 1.520(9) . ?
C414 C415 1.525(7) . ?
C415 C416 1.541(6) . ?
C416 C417 1.526(7) . ?
C417 C418 1.526(7) . ?
S1 O11 1.397(5) . ?
S1 O12 1.401(5) . ?
S1 O13 1.443(6) . ?
S1 C5 1.805(8) . ?
C5 F52 1.299(9) . ?
C5 F51 1.305(9) . ?
C5 F53 1.336(9) . ?
S2 O21 1.427(4) . ?
S2 O22 1.428(4) . ?
S2 O23 1.433(4) . ?
S2 C6 1.818(6) . ?
C6 F63 1.304(6) . ?
C6 F61 1.316(6) . ?
C6 F62 1.338(7) . ?
 
loop_
 _geom_angle_atom_site_label_1
 _geom_angle_atom_site_label_2
 _geom_angle_atom_site_label_3
 _geom_angle
 _geom_angle_site_symmetry_1
 _geom_angle_site_symmetry_3
 _geom_angle_publ_flag
C1 Pd1 P2 174.97(13) . . ?
C1 Pd1 P1 99.09(13) . . ?
P2 Pd1 P1 85.94(4) . . ?
C1 Pd1 Pd2 77.78(13) . . ?
P2 Pd1 Pd2 97.20(3) . . ?
P1 Pd1 Pd2 176.71(3) . . ?
C2 Pd2 P3 171.80(14) . . ?
C2 Pd2 P4 102.85(14) . . ?
P3 Pd2 P4 83.81(4) . . ?
C2 Pd2 Pd1 71.78(14) . . ?
P3 Pd2 Pd1 101.33(3) . . ?
P4 Pd2 Pd1 174.07(3) . . ?
C115 P1 C11A 92.7(5) . . ?
C115 P1 C111 96.8(3) . . ?
C11A P1 C111 116.0(4) . . ?
C115 P1 C11 119.5(4) . . ?
C11A P1 C11 28.1(4) . . ?
C111 P1 C11 101.9(3) . . ?
C115 P1 Pd1 115.8(2) . . ?
C11A P1 Pd1 108.3(3) . . ?
C111 P1 Pd1 122.78(16) . . ?
C11 P1 Pd1 100.7(2) . . ?
C21 C11 P1 106.9(5) . . ?
C11 C21 P2 107.5(5) . . ?
C21 P2 C215 112.9(3) . . ?
C21 P2 C211 97.2(3) . . ?
C215 P2 C211 95.4(2) . . ?
C21 P2 C21A 25.9(4) . . ?
C215 P2 C21A 96.6(4) . . ?
C211 P2 C21A 120.0(5) . . ?
C21 P2 Pd1 105.7(3) . . ?
C215 P2 Pd1 122.56(15) . . ?
C211 P2 Pd1 120.49(17) . . ?
C21A P2 Pd1 100.7(3) . . ?
C21A C11A P1 104.9(7) . . ?
C11A C21A P2 110.1(7) . . ?
C31 P3 C315 109.9(2) . . ?
C31 P3 C311 105.4(2) . . ?
C315 P3 C311 96.7(2) . . ?
C31 P3 Pd2 102.61(16) . . ?
C315 P3 Pd2 124.23(16) . . ?
C311 P3 Pd2 116.91(16) . . ?
C415 P4 C41 108.2(2) . . ?
C415 P4 C411 96.2(2) . . ?
C41 P4 C411 108.4(2) . . ?
C415 P4 Pd2 117.33(15) . . ?
C41 P4 Pd2 107.69(15) . . ?
C411 P4 Pd2 118.19(15) . . ?
O1 C1 Pd1 173.3(4) . . ?
O2 C2 Pd2 172.8(4) . . ?
C41 C31 P3 108.4(3) . . ?
C31 C41 P4 110.3(3) . . ?
C118 C111 C112 114.7(4) . . ?
C118 C111 P1 107.8(3) . . ?
C112 C111 P1 110.1(3) . . ?
C113 C112 C111 116.0(5) . . ?
C112 C113 C114 115.1(5) . . ?
C115 C114 C113 115.6(5) . . ?
C116 C115 C114 115.8(7) . . ?
C116 C115 P1 108.0(4) . . ?
C114 C115 P1 110.1(6) . . ?
C117 C116 C115 116.4(5) . . ?
C116 C117 C118 116.6(5) . . ?
C111 C118 C117 117.0(5) . . ?
C218 C211 C212 114.4(5) . . ?
C218 C211 P2 109.6(3) . . ?
C212 C211 P2 108.6(4) . . ?
C213 C212 C211 117.4(4) . . ?
C212 C213 C214 118.4(4) . . ?
C213 C214 C215 116.2(4) . . ?
C216 C215 C214 113.5(4) . . ?
C216 C215 P2 110.1(3) . . ?
C214 C215 P2 109.6(3) . . ?
C217 C216 C215 116.4(4) . . ?
C216 C217 C218 113.6(4) . . ?
C217 C218 C211 116.1(4) . . ?
C318 C311 C312 114.6(5) . . ?
C318 C311 P3 108.7(3) . . ?
C312 C311 P3 109.7(3) . . ?
C313 C312 C311 116.3(4) . . ?
C312 C313 C314 115.4(4) . . ?
C313 C314 C315 116.0(5) . . ?
C316 C315 C314 115.2(4) . . ?
C316 C315 P3 107.2(3) . . ?
C314 C315 P3 109.6(3) . . ?
C317 C316 C315 117.3(4) . . ?
C318 C317 C316 117.6(5) . . ?
C317 C318 C311 117.0(5) . . ?
C418 C411 C412 113.6(4) . . ?
C418 C411 P4 110.6(3) . . ?
C412 C411 P4 108.0(3) . . ?
C413 C412 C411 117.1(5) . . ?
C414 C413 C412 116.9(4) . . ?
C413 C414 C415 116.9(4) . . ?
C414 C415 C416 116.1(4) . . ?
C414 C415 P4 108.3(3) . . ?
C416 C415 P4 109.4(3) . . ?
C417 C416 C415 115.7(4) . . ?
C416 C417 C418 115.2(4) . . ?
C417 C418 C411 116.1(4) . . ?
O11 S1 O12 120.2(4) . . ?
O11 S1 O13 114.4(4) . . ?
O12 S1 O13 111.8(3) . . ?
O11 S1 C5 103.3(3) . . ?
O12 S1 C5 104.2(4) . . ?
O13 S1 C5 99.7(5) . . ?
F52 C5 F51 112.5(7) . . ?
F52 C5 F53 105.3(6) . . ?
F51 C5 F53 104.4(8) . . ?
F52 C5 S1 112.5(7) . . ?
F51 C5 S1 112.0(5) . . ?
F53 C5 S1 109.6(5) . . ?
O21 S2 O22 115.0(3) . . ?
O21 S2 O23 114.7(3) . . ?
O22 S2 O23 115.7(3) . . ?
O21 S2 C6 103.1(3) . . ?
O22 S2 C6 103.4(2) . . ?
O23 S2 C6 102.3(3) . . ?
F63 C6 F61 105.7(5) . . ?
F63 C6 F62 107.5(5) . . ?
F61 C6 F62 106.2(5) . . ?
F63 C6 S2 112.7(4) . . ?
F61 C6 S2 113.4(4) . . ?
F62 C6 S2 110.9(4) . . ?
 
_diffrn_measured_fraction_theta_max    0.995
_diffrn_reflns_theta_full              26.37
_diffrn_measured_fraction_theta_full   0.995
_refine_diff_density_max    2.040
_refine_diff_density_min   -0.788
_refine_diff_density_rms    0.118

#====END
#======================================================================
 data_Pd(BCOPE)(OTf)~2~
 
_audit_creation_method            SHELXL-97
_chemical_name_systematic
;
 ?
;
_chemical_name_common             ?
_chemical_melting_point           ?
_chemical_formula_moiety           
'2(C18 H32 O2 P2 Pd), 4(C F3 O3 S), H2 O '
_chemical_formula_sum
 'C40 H66 F12 O17 P4 Pd2 S4'
_chemical_formula_weight          1511.93
 
loop_
 _atom_type_symbol
 _atom_type_description
 _atom_type_scat_dispersion_real
 _atom_type_scat_dispersion_imag
 _atom_type_scat_source
 'C'  'C'   0.0033   0.0016
 'International Tables Vol C Tables 4.2.6.8 and 6.1.1.4'
 'H'  'H'   0.0000   0.0000
 'International Tables Vol C Tables 4.2.6.8 and 6.1.1.4'
 'O'  'O'   0.0106   0.0060
 'International Tables Vol C Tables 4.2.6.8 and 6.1.1.4'
 'F'  'F'   0.0171   0.0103
 'International Tables Vol C Tables 4.2.6.8 and 6.1.1.4'
 'P'  'P'   0.1023   0.0942
 'International Tables Vol C Tables 4.2.6.8 and 6.1.1.4'
 'Pd'  'Pd'  -0.9988   1.0072
 'International Tables Vol C Tables 4.2.6.8 and 6.1.1.4'
 'S'  'S'   0.1246   0.1234
 'International Tables Vol C Tables 4.2.6.8 and 6.1.1.4'
 
_symmetry_cell_setting                  monoclinic
_symmetry_space_group_name_H-M          'C 1 2/c 1'
_symmetry_space_group_name_Hall         '-C 2yc'
_symmetry_Int_Tables_number             15
 
loop_
 _symmetry_equiv_pos_as_xyz
 'x, y, z'
 '-x, y, -z+1/2'
 'x+1/2, y+1/2, z'
 '-x+1/2, y+1/2, -z+1/2'
 '-x, -y, -z'
 'x, -y, z-1/2'
 '-x+1/2, -y+1/2, -z'
 'x+1/2, -y+1/2, z-1/2'
 
_cell_length_a                    44.5742(18)
_cell_length_b                    11.3560(7)
_cell_length_c                    23.1131(12)
_cell_angle_alpha                 90.0
_cell_angle_beta                  100.165(4)
_cell_angle_gamma                 90.0
_cell_volume                      11515.8(10)
_cell_formula_units_Z             8
_cell_measurement_temperature     180(2)
_cell_measurement_reflns_used           7975
_cell_measurement_theta_max             32.2
_cell_measurement_theta_min             2.9
 
_exptl_crystal_description              box
_exptl_crystal_colour                   'pale yellow'
_exptl_crystal_size_max                 0.63
_exptl_crystal_size_mid                 0.39
_exptl_crystal_size_min                 0.15
_exptl_crystal_density_meas       ?
_exptl_crystal_density_diffrn     1.744
_exptl_crystal_density_method     'not measured'
_exptl_crystal_F_000              6128
_exptl_absorpt_coefficient_mu     0.984
_exptl_absorpt_correction_type  multi-scan
_exptl_absorpt_process_details
;
[c.f. r.h. blessing, acta cryst. (1995), a51, 33-38]
;
_exptl_absorpt_correction_T_min   0.6565
_exptl_absorpt_correction_T_max   0.8313
 
_exptl_special_details
;
 ?
;
 
_diffrn_ambient_temperature       180(2)
_diffrn_radiation_wavelength      0.71073
_diffrn_radiation_type            MoK\a
_diffrn_radiation_source          'fine-focus sealed tube'
_diffrn_radiation_monochromator   graphite
_diffrn_measurement_device_type   'Oxford-Diffraction XCALIBUR'
_diffrn_measurement_method        '\w and \f'
_diffrn_detector_area_resol_mean  8.2632
_diffrn_standards_number          0
_diffrn_standards_interval_count  0
_diffrn_standards_interval_time   0
_diffrn_standards_decay_%         0
_diffrn_reflns_number             43903
_diffrn_reflns_av_R_equivalents   0.0525
_diffrn_reflns_av_sigmaI/netI     0.0473
_diffrn_reflns_limit_h_min        -55
_diffrn_reflns_limit_h_max        55
_diffrn_reflns_limit_k_min        -14
_diffrn_reflns_limit_k_max        14
_diffrn_reflns_limit_l_min        -23
_diffrn_reflns_limit_l_max        28
_diffrn_reflns_theta_min          2.79
_diffrn_reflns_theta_max          26.37
_reflns_number_total              11769
_reflns_number_gt                 8619
_reflns_threshold_expression      >2\s(I)
 
_computing_data_collection
;
CrysAlis CCD, Version 1.170.32 (Oxford Diffraction, 2003)
;
_computing_cell_refinement
;
CrysAlis RED, Version 1.170.32 (Oxford Diffraction, 2003)

;
_computing_data_reduction     'CrysAlis RED'
_computing_structure_solution           'SIR-97 (Altomare et al., 1997)'
_computing_structure_refinement         'SHELXL-97 (Sheldrick, 1997)'
_computing_molecular_graphics           'Ortep-3 for Windows (Farrugia, 1997)'
_computing_publication_material
                                   'WinGX publication routines (Farrugia, 1999)'
 
_refine_special_details
;
 Refinement of F^2^ against ALL reflections.  The weighted R-factor wR and
 goodness of fit S are based on F^2^, conventional R-factors R are based
 on F, with F set to zero for negative F^2^. The threshold expression of
 F^2^ > 2sigma(F^2^) is used only for calculating R-factors(gt) etc. and is
 not relevant to the choice of reflections for refinement.  R-factors based
 on F^2^ are statistically about twice as large as those based on F, and R-
 factors based on ALL data will be even larger.
;
 
_refine_ls_structure_factor_coef  Fsqd
_refine_ls_matrix_type            full
_refine_ls_weighting_scheme       calc
_refine_ls_weighting_details
 'calc w=1/[\s^2^(Fo^2^)+(0.0803P)^2^+0.0000P] where P=(Fo^2^+2Fc^2^)/3'
_atom_sites_solution_primary      direct
_atom_sites_solution_secondary    difmap
_atom_sites_solution_hydrogens    geom
_refine_ls_hydrogen_treatment     constr
_refine_ls_extinction_method      none
_refine_ls_extinction_coef        ?
_refine_ls_number_reflns          11769
_refine_ls_number_parameters      712
_refine_ls_number_restraints      12
_refine_ls_R_factor_all           0.0663
_refine_ls_R_factor_gt            0.0486
_refine_ls_wR_factor_ref          0.1363
_refine_ls_wR_factor_gt           0.1243
_refine_ls_goodness_of_fit_ref    1.059
_refine_ls_restrained_S_all       1.059
_refine_ls_shift/su_max           0.002
_refine_ls_shift/su_mean          0.000
 
loop_
 _atom_site_label
 _atom_site_type_symbol
 _atom_site_fract_x
 _atom_site_fract_y
 _atom_site_fract_z
 _atom_site_U_iso_or_equiv
 _atom_site_adp_type
 _atom_site_occupancy
 _atom_site_symmetry_multiplicity
 _atom_site_calc_flag
 _atom_site_refinement_flags
 _atom_site_disorder_assembly
 _atom_site_disorder_group
Pd1 Pd 0.620539(7) 0.51423(3) -0.175731(14) 0.01918(10) Uani 1 1 d . . .
P1 P 0.65334(2) 0.57501(9) -0.09658(5) 0.0206(2) Uani 1 1 d . . .
P2 P 0.59711(2) 0.42467(10) -0.10970(5) 0.0206(2) Uani 1 1 d . . .
O1 O 0.59405(7) 0.4313(3) -0.25180(12) 0.0284(7) Uani 1 1 d D . .
H1A H 0.6062 0.3761 -0.2504 0.043 Uiso 1 1 d RD . .
H1B H 0.5950 0.4761 -0.2795 0.043 Uiso 1 1 d RD . .
O2 O 0.63989(7) 0.6084(3) -0.23968(12) 0.0278(7) Uani 1 1 d D . .
H2A H 0.6486 0.5638 -0.2595 0.042 Uiso 1 1 d RD . .
H2B H 0.6257 0.6464 -0.2578 0.042 Uiso 1 1 d RD . .
C11 C 0.63546(11) 0.5590(4) -0.0325(2) 0.0319(11) Uani 1 1 d . . .
C21 C 0.62070(11) 0.4359(4) -0.0365(2) 0.0328(11) Uani 1 1 d . . .
C111 C 0.67207(10) 0.7175(4) -0.0951(2) 0.0286(10) Uani 1 1 d . . .
H111 H 0.6561 0.7801 -0.1004 0.034 Uiso 1 1 calc R . .
C112 C 0.69206(11) 0.7324(4) -0.0328(2) 0.0353(11) Uani 1 1 d . . .
H11A H 0.7012 0.8120 -0.0300 0.042 Uiso 1 1 calc R . .
H11B H 0.6787 0.7273 -0.0029 0.042 Uiso 1 1 calc R . .
C113 C 0.71770(11) 0.6414(4) -0.0176(2) 0.0361(12) Uani 1 1 d . . .
H11C H 0.7336 0.6593 -0.0412 0.043 Uiso 1 1 calc R . .
H11D H 0.7270 0.6510 0.0243 0.043 Uiso 1 1 calc R . .
C114 C 0.70819(11) 0.5130(4) -0.0281(2) 0.0297(11) Uani 1 1 d . . .
H11E H 0.6975 0.4881 0.0040 0.036 Uiso 1 1 calc R . .
H11F H 0.7269 0.4646 -0.0250 0.036 Uiso 1 1 calc R . .
C115 C 0.68756(10) 0.4844(4) -0.0870(2) 0.0234(9) Uani 1 1 d . . .
H115 H 0.6812 0.4000 -0.0861 0.028 Uiso 1 1 calc R . .
C116 C 0.70200(11) 0.5029(4) -0.1420(2) 0.0290(11) Uani 1 1 d . . .
H11G H 0.7198 0.4499 -0.1393 0.035 Uiso 1 1 calc R . .
H11H H 0.6870 0.4782 -0.1768 0.035 Uiso 1 1 calc R . .
C117 C 0.71245(11) 0.6281(4) -0.1528(2) 0.0354(11) Uani 1 1 d . . .
H11I H 0.7317 0.6434 -0.1253 0.042 Uiso 1 1 calc R . .
H11J H 0.7170 0.6319 -0.1932 0.042 Uiso 1 1 calc R . .
C118 C 0.69011(11) 0.7264(4) -0.1458(2) 0.0313(11) Uani 1 1 d . . .
H11K H 0.6752 0.7320 -0.1830 0.038 Uiso 1 1 calc R . .
H11L H 0.7016 0.8014 -0.1412 0.038 Uiso 1 1 calc R . .
C211 C 0.58393(11) 0.2732(4) -0.1206(2) 0.0330(11) Uani 1 1 d . . .
H211 H 0.6020 0.2217 -0.1222 0.040 Uiso 1 1 calc R . .
C212 C 0.57010(12) 0.2379(4) -0.0657(2) 0.0387(12) Uani 1 1 d . . .
H21A H 0.5642 0.1538 -0.0693 0.046 Uiso 1 1 calc R . .
H21B H 0.5861 0.2459 -0.0303 0.046 Uiso 1 1 calc R . .
C213 C 0.54238(11) 0.3098(5) -0.0562(2) 0.0413(13) Uani 1 1 d . . .
H21C H 0.5249 0.2883 -0.0872 0.050 Uiso 1 1 calc R . .
H21D H 0.5370 0.2873 -0.0179 0.050 Uiso 1 1 calc R . .
C214 C 0.54660(11) 0.4432(5) -0.0571(2) 0.0338(11) Uani 1 1 d . . .
H21E H 0.5599 0.4668 -0.0199 0.041 Uiso 1 1 calc R . .
H21F H 0.5265 0.4806 -0.0577 0.041 Uiso 1 1 calc R . .
C215 C 0.56036(10) 0.4932(4) -0.1086(2) 0.0276(10) Uani 1 1 d . . .
H215 H 0.5636 0.5796 -0.1022 0.033 Uiso 1 1 calc R . .
C216 C 0.54104(10) 0.4746(4) -0.1701(2) 0.0345(11) Uani 1 1 d . . .
H21G H 0.5212 0.5145 -0.1711 0.041 Uiso 1 1 calc R . .
H21H H 0.5514 0.5144 -0.1992 0.041 Uiso 1 1 calc R . .
C217 C 0.53475(11) 0.3467(5) -0.1901(2) 0.0414(13) Uani 1 1 d . . .
H21I H 0.5183 0.3157 -0.1706 0.050 Uiso 1 1 calc R . .
H21J H 0.5268 0.3472 -0.2329 0.050 Uiso 1 1 calc R . .
C218 C 0.56155(12) 0.2605(4) -0.1785(2) 0.0379(12) Uani 1 1 d . . .
H21K H 0.5531 0.1796 -0.1803 0.046 Uiso 1 1 calc R . .
H21L H 0.5732 0.2682 -0.2110 0.046 Uiso 1 1 calc R . .
Pd2 Pd 0.618856(7) 0.01501(3) 0.173142(13) 0.01827(10) Uani 1 1 d . . .
P3 P 0.59431(2) -0.07994(9) 0.09361(5) 0.0196(2) Uani 1 1 d . . .
P4 P 0.65051(2) 0.07131(9) 0.11296(5) 0.0188(2) Uani 1 1 d . . .
O3 O 0.63926(7) 0.1139(2) 0.24817(12) 0.0244(7) Uani 1 1 d D . .
H3A H 0.6490 0.0717 0.2736 0.037 Uiso 1 1 d RD . .
H3B H 0.6249 0.1486 0.2582 0.037 Uiso 1 1 d RD . .
O4 O 0.59355(7) -0.0647(3) 0.23386(12) 0.0282(7) Uani 1 1 d D . .
H4A H 0.6045 -0.1236 0.2413 0.042 Uiso 1 1 d RD . .
H4B H 0.5935 -0.0236 0.2633 0.042 Uiso 1 1 d RD . .
C31 C 0.61832(10) -0.0825(4) 0.03761(19) 0.0279(10) Uani 1 1 d . . .
C41 C 0.63251(10) 0.0415(4) 0.03741(19) 0.0281(10) Uani 1 1 d . . .
C311 C 0.55894(10) -0.0036(4) 0.0640(2) 0.0255(10) Uani 1 1 d . . .
H311 H 0.5639 0.0807 0.0574 0.031 Uiso 1 1 calc R . .
C312 C 0.53915(11) -0.0081(4) 0.1120(2) 0.0313(11) Uani 1 1 d . . .
H31A H 0.5504 0.0310 0.1476 0.038 Uiso 1 1 calc R . .
H31B H 0.5205 0.0385 0.0985 0.038 Uiso 1 1 calc R . .
C313 C 0.52962(12) -0.1306(5) 0.1295(2) 0.0412(13) Uani 1 1 d . . .
H31C H 0.5207 -0.1226 0.1656 0.049 Uiso 1 1 calc R . .
H31D H 0.5133 -0.1596 0.0980 0.049 Uiso 1 1 calc R . .
C314 C 0.55444(12) -0.2244(4) 0.1405(2) 0.0376(12) Uani 1 1 d . . .
H31E H 0.5444 -0.3025 0.1385 0.045 Uiso 1 1 calc R . .
H31F H 0.5657 -0.2143 0.1811 0.045 Uiso 1 1 calc R . .
C315 C 0.57777(11) -0.2259(4) 0.0988(2) 0.0314(11) Uani 1 1 d . . .
H315 H 0.5946 -0.2814 0.1152 0.038 Uiso 1 1 calc R . .
C316 C 0.56421(12) -0.2661(4) 0.0356(2) 0.0369(12) Uani 1 1 d . . .
H31G H 0.5808 -0.2680 0.0123 0.044 Uiso 1 1 calc R . .
H31H H 0.5566 -0.3476 0.0374 0.044 Uiso 1 1 calc R . .
C317 C 0.53836(11) -0.1899(5) 0.0032(2) 0.0412(13) Uani 1 1 d . . .
H31I H 0.5338 -0.2157 -0.0384 0.049 Uiso 1 1 calc R . .
H31J H 0.5199 -0.2042 0.0205 0.049 Uiso 1 1 calc R . .
C318 C 0.54462(10) -0.0577(4) 0.0046(2) 0.0323(11) Uani 1 1 d . . .
H31K H 0.5251 -0.0167 -0.0096 0.039 Uiso 1 1 calc R . .
H31L H 0.5583 -0.0408 -0.0239 0.039 Uiso 1 1 calc R . .
C411 C 0.68587(9) -0.0130(3) 0.12810(19) 0.0218(9) Uani 1 1 d . . .
H411 H 0.6805 -0.0986 0.1268 0.026 Uiso 1 1 calc R . .
C412 C 0.70496(10) 0.0111(4) 0.0802(2) 0.0291(10) Uani 1 1 d . . .
H41A H 0.7243 -0.0336 0.0900 0.035 Uiso 1 1 calc R . .
H41B H 0.6938 -0.0206 0.0426 0.035 Uiso 1 1 calc R . .
C413 C 0.71278(10) 0.1396(4) 0.0706(2) 0.0309(11) Uani 1 1 d . . .
H41C H 0.7292 0.1639 0.1030 0.037 Uiso 1 1 calc R . .
H41D H 0.7210 0.1449 0.0336 0.037 Uiso 1 1 calc R . .
C414 C 0.68655(11) 0.2268(4) 0.0673(2) 0.0309(11) Uani 1 1 d . . .
H41E H 0.6727 0.2160 0.0292 0.037 Uiso 1 1 calc R . .
H41F H 0.6949 0.3075 0.0678 0.037 Uiso 1 1 calc R . .
C415 C 0.66749(10) 0.2165(4) 0.11730(19) 0.0260(10) Uani 1 1 d . . .
H415 H 0.6507 0.2762 0.1101 0.031 Uiso 1 1 calc R . .
C416 C 0.68595(11) 0.2365(4) 0.1796(2) 0.0319(11) Uani 1 1 d . . .
H41G H 0.6960 0.3142 0.1800 0.038 Uiso 1 1 calc R . .
H41H H 0.6714 0.2412 0.2072 0.038 Uiso 1 1 calc R . .
C417 C 0.70996(11) 0.1467(4) 0.2032(2) 0.0333(11) Uani 1 1 d . . .
H41I H 0.7154 0.1577 0.2463 0.040 Uiso 1 1 calc R . .
H41J H 0.7284 0.1636 0.1864 0.040 Uiso 1 1 calc R . .
C418 C 0.70140(10) 0.0172(4) 0.1911(2) 0.0297(11) Uani 1 1 d . . .
H41K H 0.6876 -0.0068 0.2183 0.036 Uiso 1 1 calc R . .
H41L H 0.7202 -0.0307 0.2008 0.036 Uiso 1 1 calc R . .
S1 S 0.58427(3) 0.85001(10) -0.15360(5) 0.0266(2) Uani 1 1 d . . .
O11 O 0.59284(9) 0.9718(3) -0.15617(16) 0.0411(9) Uani 1 1 d . . .
O12 O 0.59735(8) 0.7759(3) -0.19322(14) 0.0377(8) Uani 1 1 d . . .
O13 O 0.58587(8) 0.8019(3) -0.09577(14) 0.0422(9) Uani 1 1 d . . .
C1 C 0.54378(12) 0.8523(5) -0.1846(2) 0.0425(13) Uani 1 1 d . . .
F11 F 0.53906(8) 0.8943(3) -0.23853(15) 0.0668(10) Uani 1 1 d . . .
F12 F 0.53147(8) 0.7472(3) -0.18577(18) 0.0740(11) Uani 1 1 d . . .
F13 F 0.52906(8) 0.9219(4) -0.15305(17) 0.0736(11) Uani 1 1 d . . .
S2 S 0.67580(3) 0.09834(11) -0.12187(5) 0.0316(3) Uani 1 1 d . . .
O21 O 0.67198(10) 0.0206(3) -0.17143(17) 0.0546(11) Uani 1 1 d . . .
O22 O 0.67305(10) 0.0424(5) -0.06842(18) 0.0717(14) Uani 1 1 d . . .
O23 O 0.66144(9) 0.2086(4) -0.1341(2) 0.0712(14) Uani 1 1 d . . .
C2 C 0.71574(12) 0.1329(5) -0.1131(2) 0.0423(13) Uani 1 1 d . . .
F21 F 0.72343(9) 0.1777(4) -0.16031(16) 0.0912(15) Uani 1 1 d . . .
F22 F 0.72356(8) 0.2135(3) -0.07042(14) 0.0630(10) Uani 1 1 d . . .
F23 F 0.73302(9) 0.0397(4) -0.0968(2) 0.0903(14) Uani 1 1 d . . .
S3 S 0.58378(3) 0.35643(10) 0.12836(5) 0.0268(2) Uani 1 1 d . . .
O31 O 0.59571(8) 0.2815(3) 0.17799(14) 0.0420(9) Uani 1 1 d . . .
O32 O 0.58603(8) 0.3067(3) 0.07306(14) 0.0452(9) Uani 1 1 d . . .
O33 O 0.59310(9) 0.4768(3) 0.13766(16) 0.0433(9) Uani 1 1 d . . .
C3 C 0.54317(12) 0.3628(5) 0.1295(2) 0.0419(13) Uani 1 1 d . . .
F31 F 0.53763(8) 0.4059(4) 0.17920(16) 0.0739(11) Uani 1 1 d . . .
F32 F 0.52997(8) 0.2603(3) 0.1207(2) 0.0820(13) Uani 1 1 d . . .
F33 F 0.52958(8) 0.4339(4) 0.08655(17) 0.0757(12) Uani 1 1 d . . .
S4 S 0.67323(3) -0.39709(10) 0.15166(5) 0.0306(3) Uani 1 1 d . . .
O41 O 0.67357(10) -0.4730(4) 0.10344(18) 0.0660(13) Uani 1 1 d . . .
O42 O 0.66743(12) -0.4574(4) 0.20323(19) 0.0777(15) Uani 1 1 d . . .
O43 O 0.65738(9) -0.2895(4) 0.1422(2) 0.0804(16) Uani 1 1 d . . .
C4 C 0.71215(13) -0.3547(5) 0.1761(3) 0.0469(14) Uani 1 1 d . . .
F41 F 0.72272(10) -0.2960(5) 0.1344(2) 0.1067(16) Uani 1 1 d . . .
F42 F 0.71534(9) -0.2821(4) 0.22023(18) 0.0816(13) Uani 1 1 d . . .
F43 F 0.72974(9) -0.4453(4) 0.1906(2) 0.1061(18) Uani 1 1 d . . .
O10 O 0.63182(8) -0.2472(3) 0.25152(16) 0.0459(9) Uani 1 1 d . . .
H1OA H 0.6410 -0.2356 0.2866 0.069 Uiso 1 1 d R . .
H10B H 0.6393 -0.2577 0.2205 0.069 Uiso 1 1 d R . .
 
loop_
 _atom_site_aniso_label
 _atom_site_aniso_U_11
 _atom_site_aniso_U_22
 _atom_site_aniso_U_33
 _atom_site_aniso_U_23
 _atom_site_aniso_U_13
 _atom_site_aniso_U_12
Pd1 0.01939(18) 0.02052(18) 0.01709(17) 0.00076(12) 0.00167(13) -0.00219(12)
P1 0.0188(5) 0.0200(6) 0.0220(6) -0.0007(4) 0.0010(4) -0.0014(4)
P2 0.0196(5) 0.0215(6) 0.0205(6) 0.0012(4) 0.0027(4) -0.0021(4)
O1 0.0363(18) 0.0240(16) 0.0225(16) 0.0020(13) -0.0012(14) -0.0067(14)
O2 0.0294(17) 0.0302(17) 0.0247(16) 0.0016(13) 0.0069(13) -0.0066(13)
C11 0.031(3) 0.042(3) 0.024(2) -0.003(2) 0.009(2) -0.009(2)
C21 0.029(3) 0.042(3) 0.024(2) 0.008(2) -0.005(2) -0.010(2)
C111 0.030(2) 0.019(2) 0.036(3) -0.0033(19) 0.002(2) 0.0037(18)
C112 0.038(3) 0.028(3) 0.038(3) -0.014(2) 0.002(2) -0.006(2)
C113 0.036(3) 0.037(3) 0.030(3) -0.005(2) -0.010(2) -0.009(2)
C114 0.029(3) 0.031(3) 0.026(2) 0.0067(19) -0.004(2) 0.0009(19)
C115 0.023(2) 0.016(2) 0.031(2) 0.0027(18) 0.0038(19) 0.0020(17)
C116 0.027(2) 0.030(3) 0.029(3) -0.0038(19) 0.003(2) 0.0073(19)
C117 0.030(3) 0.037(3) 0.040(3) 0.008(2) 0.008(2) -0.003(2)
C118 0.036(3) 0.023(2) 0.031(3) 0.0071(19) -0.004(2) -0.0086(19)
C211 0.037(3) 0.022(2) 0.041(3) 0.001(2) 0.009(2) -0.0027(19)
C212 0.053(3) 0.028(3) 0.038(3) 0.001(2) 0.015(2) -0.014(2)
C213 0.036(3) 0.059(4) 0.031(3) 0.000(2) 0.012(2) -0.022(3)
C214 0.025(2) 0.050(3) 0.029(3) -0.004(2) 0.013(2) -0.002(2)
C215 0.023(2) 0.027(2) 0.033(3) -0.0012(19) 0.005(2) -0.0002(18)
C216 0.019(2) 0.047(3) 0.037(3) 0.006(2) 0.000(2) 0.007(2)
C217 0.035(3) 0.062(4) 0.024(2) -0.005(2) -0.005(2) -0.012(3)
C218 0.051(3) 0.032(3) 0.033(3) -0.007(2) 0.013(2) -0.019(2)
Pd2 0.01899(18) 0.01985(18) 0.01604(17) -0.00039(12) 0.00325(13) -0.00232(12)
P3 0.0203(5) 0.0204(6) 0.0179(5) -0.0016(4) 0.0030(4) -0.0030(4)
P4 0.0176(5) 0.0183(5) 0.0208(5) 0.0020(4) 0.0039(4) -0.0011(4)
O3 0.0282(16) 0.0251(16) 0.0192(15) -0.0002(12) 0.0021(12) -0.0050(13)
O4 0.0384(19) 0.0250(16) 0.0242(16) -0.0038(13) 0.0143(14) -0.0082(14)
C31 0.023(2) 0.034(3) 0.027(2) -0.0097(19) 0.0050(19) -0.0070(19)
C41 0.022(2) 0.038(3) 0.024(2) 0.001(2) 0.0025(18) -0.006(2)
C311 0.023(2) 0.024(2) 0.029(2) 0.0011(18) 0.0022(19) -0.0012(17)
C312 0.022(2) 0.039(3) 0.034(3) -0.008(2) 0.008(2) 0.0033(19)
C313 0.039(3) 0.048(3) 0.042(3) -0.010(2) 0.021(2) -0.017(2)
C314 0.048(3) 0.038(3) 0.028(3) -0.001(2) 0.010(2) -0.023(2)
C315 0.038(3) 0.024(2) 0.032(3) -0.002(2) 0.005(2) -0.004(2)
C316 0.049(3) 0.028(3) 0.035(3) -0.012(2) 0.011(2) -0.015(2)
C317 0.033(3) 0.057(3) 0.032(3) -0.010(2) 0.001(2) -0.021(3)
C318 0.025(2) 0.044(3) 0.026(2) 0.000(2) -0.001(2) -0.003(2)
C411 0.019(2) 0.016(2) 0.030(2) -0.0015(17) 0.0016(18) 0.0020(16)
C412 0.022(2) 0.034(3) 0.032(3) -0.007(2) 0.006(2) 0.0019(19)
C413 0.025(2) 0.042(3) 0.028(2) 0.003(2) 0.011(2) -0.004(2)
C414 0.038(3) 0.025(2) 0.030(3) 0.008(2) 0.007(2) -0.006(2)
C415 0.027(2) 0.018(2) 0.034(3) 0.0038(18) 0.008(2) 0.0030(17)
C416 0.038(3) 0.022(2) 0.040(3) -0.008(2) 0.019(2) -0.011(2)
C417 0.031(3) 0.039(3) 0.030(3) -0.008(2) 0.005(2) -0.006(2)
C418 0.021(2) 0.038(3) 0.028(2) 0.000(2) -0.001(2) 0.0034(19)
S1 0.0314(6) 0.0272(6) 0.0225(6) 0.0033(5) 0.0080(5) 0.0014(5)
O11 0.052(2) 0.0313(19) 0.040(2) 0.0014(16) 0.0086(18) -0.0081(16)
O12 0.046(2) 0.0356(19) 0.0347(19) 0.0002(15) 0.0147(16) 0.0048(16)
O13 0.053(2) 0.045(2) 0.0292(18) 0.0095(16) 0.0096(16) 0.0022(18)
C1 0.039(3) 0.038(3) 0.052(3) 0.008(3) 0.010(3) 0.002(2)
F11 0.048(2) 0.095(3) 0.051(2) 0.028(2) -0.0092(17) 0.0003(19)
F12 0.046(2) 0.062(2) 0.108(3) 0.016(2) -0.004(2) -0.0205(17)
F13 0.053(2) 0.083(3) 0.091(3) 0.006(2) 0.031(2) 0.030(2)
S2 0.0342(7) 0.0327(6) 0.0274(6) -0.0053(5) 0.0039(5) -0.0061(5)
O21 0.067(3) 0.052(2) 0.041(2) -0.0207(19) -0.001(2) -0.009(2)
O22 0.062(3) 0.116(4) 0.039(2) 0.012(3) 0.014(2) -0.033(3)
O23 0.049(3) 0.043(2) 0.112(4) -0.020(2) -0.015(2) 0.010(2)
C2 0.042(3) 0.049(3) 0.038(3) 0.004(3) 0.012(2) -0.003(3)
F21 0.078(3) 0.150(4) 0.050(2) 0.014(2) 0.021(2) -0.051(3)
F22 0.058(2) 0.074(2) 0.053(2) -0.0079(18) -0.0030(17) -0.0321(19)
F23 0.056(3) 0.084(3) 0.123(4) 0.001(3) -0.005(2) 0.024(2)
S3 0.0268(6) 0.0299(6) 0.0230(6) -0.0037(5) 0.0026(5) 0.0013(5)
O31 0.047(2) 0.043(2) 0.0318(19) 0.0067(16) -0.0039(16) 0.0082(17)
O32 0.041(2) 0.065(3) 0.0293(19) -0.0167(18) 0.0044(16) 0.0019(18)
O33 0.046(2) 0.038(2) 0.044(2) 0.0000(17) 0.0051(18) -0.0100(17)
C3 0.032(3) 0.038(3) 0.055(3) -0.008(3) 0.003(3) 0.005(2)
F31 0.050(2) 0.112(3) 0.067(2) -0.027(2) 0.0299(19) 0.005(2)
F32 0.045(2) 0.062(2) 0.140(4) -0.014(2) 0.018(2) -0.0200(18)
F33 0.045(2) 0.090(3) 0.086(3) 0.014(2) -0.006(2) 0.027(2)
S4 0.0328(6) 0.0257(6) 0.0334(6) 0.0019(5) 0.0061(5) -0.0019(5)
O41 0.063(3) 0.093(3) 0.039(2) -0.031(2) 0.001(2) 0.002(2)
O42 0.096(4) 0.096(4) 0.047(3) 0.002(3) 0.030(3) -0.046(3)
O43 0.038(2) 0.038(2) 0.156(5) 0.012(3) -0.010(3) 0.0073(19)
C4 0.039(3) 0.045(3) 0.056(4) -0.006(3) 0.005(3) 0.003(3)
F41 0.077(3) 0.139(4) 0.116(4) -0.001(3) 0.051(3) -0.051(3)
F42 0.064(2) 0.081(3) 0.093(3) -0.048(2) -0.006(2) -0.015(2)
F43 0.058(3) 0.071(3) 0.168(5) -0.029(3) -0.040(3) 0.026(2)
O10 0.050(2) 0.032(2) 0.057(2) -0.0080(17) 0.0142(19) 0.0027(16)
 
_geom_special_details
;
 All esds (except the esd in the dihedral angle between two l.s. planes)
 are estimated using the full covariance matrix.  The cell esds are taken
 into account individually in the estimation of esds in distances, angles
 and torsion angles; correlations between esds in cell parameters are only
 used when they are defined by crystal symmetry.  An approximate (isotropic)
 treatment of cell esds is used for estimating esds involving l.s. planes.
;
 
loop_
 _geom_bond_atom_site_label_1
 _geom_bond_atom_site_label_2
 _geom_bond_distance
 _geom_bond_site_symmetry_2
 _geom_bond_publ_flag
Pd1 O2 2.127(3) . ?
Pd1 O1 2.154(3) . ?
Pd1 P1 2.2394(11) . ?
Pd1 P2 2.2404(11) . ?
P1 C11 1.811(5) . ?
P1 C111 1.818(4) . ?
P1 C115 1.821(4) . ?
P2 C215 1.817(5) . ?
P2 C211 1.821(5) . ?
P2 C21 1.832(4) . ?
C11 C21 1.541(7) . ?
C111 C118 1.539(6) . ?
C111 C112 1.563(6) . ?
C112 C113 1.534(7) . ?
C113 C114 1.526(6) . ?
C114 C115 1.538(6) . ?
C115 C116 1.537(6) . ?
C116 C117 1.530(6) . ?
C117 C118 1.523(7) . ?
C211 C218 1.528(7) . ?
C211 C212 1.558(6) . ?
C212 C213 1.528(7) . ?
C213 C214 1.527(7) . ?
C214 C215 1.541(6) . ?
C215 C216 1.541(7) . ?
C216 C217 1.535(7) . ?
C217 C218 1.531(7) . ?
Pd2 O3 2.130(3) . ?
Pd2 O4 2.150(3) . ?
Pd2 P3 2.2420(11) . ?
Pd2 P4 2.2425(11) . ?
P3 C31 1.820(4) . ?
P3 C311 1.824(5) . ?
P3 C315 1.827(4) . ?
P4 C415 1.810(4) . ?
P4 C41 1.820(4) . ?
P4 C411 1.824(4) . ?
C31 C41 1.544(6) . ?
C311 C312 1.535(6) . ?
C311 C318 1.537(6) . ?
C312 C313 1.530(7) . ?
C313 C314 1.524(7) . ?
C314 C315 1.537(7) . ?
C315 C316 1.548(6) . ?
C316 C317 1.528(7) . ?
C317 C318 1.526(7) . ?
C411 C412 1.536(6) . ?
C411 C418 1.537(6) . ?
C412 C413 1.526(6) . ?
C413 C414 1.524(6) . ?
C414 C415 1.554(6) . ?
C415 C416 1.543(6) . ?
C416 C417 1.509(7) . ?
C417 C418 1.532(6) . ?
S1 O13 1.435(3) . ?
S1 O11 1.439(3) . ?
S1 O12 1.440(3) . ?
S1 C1 1.820(5) . ?
C1 F12 1.313(6) . ?
C1 F11 1.317(6) . ?
C1 F13 1.324(6) . ?
S2 O23 1.412(4) . ?
S2 O22 1.414(4) . ?
S2 O21 1.432(4) . ?
S2 C2 1.799(5) . ?
C2 F21 1.304(6) . ?
C2 F23 1.324(6) . ?
C2 F22 1.345(6) . ?
S3 O32 1.416(3) . ?
S3 O33 1.434(4) . ?
S3 O31 1.452(3) . ?
S3 C3 1.816(5) . ?
C3 F32 1.304(6) . ?
C3 F31 1.311(6) . ?
C3 F33 1.339(6) . ?
S4 O43 1.409(4) . ?
S4 O41 1.411(4) . ?
S4 O42 1.437(4) . ?
S4 C4 1.793(6) . ?
C4 F42 1.298(6) . ?
C4 F43 1.301(6) . ?
C4 F41 1.326(7) . ?
 
loop_
 _geom_angle_atom_site_label_1
 _geom_angle_atom_site_label_2
 _geom_angle_atom_site_label_3
 _geom_angle
 _geom_angle_site_symmetry_1
 _geom_angle_site_symmetry_3
 _geom_angle_publ_flag
O2 Pd1 O1 83.33(11) . . ?
O2 Pd1 P1 97.26(8) . . ?
O1 Pd1 P1 170.46(9) . . ?
O2 Pd1 P2 175.59(9) . . ?
O1 Pd1 P2 95.92(8) . . ?
P1 Pd1 P2 84.21(4) . . ?
C11 P1 C111 109.9(2) . . ?
C11 P1 C115 108.9(2) . . ?
C111 P1 C115 97.4(2) . . ?
C11 P1 Pd1 108.60(15) . . ?
C111 P1 Pd1 121.40(15) . . ?
C115 P1 Pd1 109.71(15) . . ?
C215 P2 C211 97.8(2) . . ?
C215 P2 C21 109.2(2) . . ?
C211 P2 C21 108.1(2) . . ?
C215 P2 Pd1 110.16(15) . . ?
C211 P2 Pd1 120.89(16) . . ?
C21 P2 Pd1 109.70(15) . . ?
C21 C11 P1 106.7(3) . . ?
C11 C21 P2 106.7(3) . . ?
C118 C111 C112 113.9(4) . . ?
C118 C111 P1 110.2(3) . . ?
C112 C111 P1 107.4(3) . . ?
C113 C112 C111 114.7(4) . . ?
C114 C113 C112 115.6(4) . . ?
C113 C114 C115 116.6(4) . . ?
C116 C115 C114 115.6(4) . . ?
C116 C115 P1 106.6(3) . . ?
C114 C115 P1 110.2(3) . . ?
C117 C116 C115 116.5(4) . . ?
C118 C117 C116 116.1(4) . . ?
C117 C118 C111 118.1(4) . . ?
C218 C211 C212 113.5(4) . . ?
C218 C211 P2 110.7(3) . . ?
C212 C211 P2 107.2(3) . . ?
C213 C212 C211 115.1(4) . . ?
C214 C213 C212 115.1(4) . . ?
C213 C214 C215 116.3(4) . . ?
C216 C215 C214 115.4(4) . . ?
C216 C215 P2 106.7(3) . . ?
C214 C215 P2 109.6(3) . . ?
C217 C216 C215 116.7(4) . . ?
C218 C217 C216 117.1(4) . . ?
C211 C218 C217 117.6(4) . . ?
O3 Pd2 O4 83.60(11) . . ?
O3 Pd2 P3 175.64(9) . . ?
O4 Pd2 P3 95.52(8) . . ?
O3 Pd2 P4 97.44(8) . . ?
O4 Pd2 P4 170.18(9) . . ?
P3 Pd2 P4 84.15(4) . . ?
C31 P3 C311 108.6(2) . . ?
C31 P3 C315 109.1(2) . . ?
C311 P3 C315 97.1(2) . . ?
C31 P3 Pd2 109.11(14) . . ?
C311 P3 Pd2 110.11(15) . . ?
C315 P3 Pd2 121.75(15) . . ?
C415 P4 C41 109.4(2) . . ?
C415 P4 C411 97.39(19) . . ?
C41 P4 C411 107.8(2) . . ?
C415 P4 Pd2 121.92(15) . . ?
C41 P4 Pd2 108.85(15) . . ?
C411 P4 Pd2 110.36(15) . . ?
C41 C31 P3 106.3(3) . . ?
C31 C41 P4 106.1(3) . . ?
C312 C311 C318 115.5(4) . . ?
C312 C311 P3 106.3(3) . . ?
C318 C311 P3 109.9(3) . . ?
C313 C312 C311 116.4(4) . . ?
C314 C313 C312 116.9(4) . . ?
C313 C314 C315 117.0(4) . . ?
C314 C315 C316 113.6(4) . . ?
C314 C315 P3 110.9(3) . . ?
C316 C315 P3 107.5(3) . . ?
C317 C316 C315 115.6(4) . . ?
C318 C317 C316 115.3(4) . . ?
C317 C318 C311 117.2(4) . . ?
C412 C411 C418 115.5(4) . . ?
C412 C411 P4 109.7(3) . . ?
C418 C411 P4 107.1(3) . . ?
C413 C412 C411 116.5(4) . . ?
C414 C413 C412 115.8(4) . . ?
C413 C414 C415 115.4(4) . . ?
C416 C415 C414 114.3(4) . . ?
C416 C415 P4 109.5(3) . . ?
C414 C415 P4 107.8(3) . . ?
C417 C416 C415 117.8(4) . . ?
C416 C417 C418 116.4(4) . . ?
C417 C418 C411 116.2(4) . . ?
O13 S1 O11 115.8(2) . . ?
O13 S1 O12 114.2(2) . . ?
O11 S1 O12 113.2(2) . . ?
O13 S1 C1 104.8(2) . . ?
O11 S1 C1 102.8(2) . . ?
O12 S1 C1 104.1(2) . . ?
F12 C1 F11 108.3(5) . . ?
F12 C1 F13 107.9(5) . . ?
F11 C1 F13 107.0(4) . . ?
F12 C1 S1 112.1(4) . . ?
F11 C1 S1 111.1(4) . . ?
F13 C1 S1 110.2(4) . . ?
O23 S2 O22 117.8(3) . . ?
O23 S2 O21 113.6(3) . . ?
O22 S2 O21 113.9(3) . . ?
O23 S2 C2 103.5(3) . . ?
O22 S2 C2 103.7(3) . . ?
O21 S2 C2 101.6(3) . . ?
F21 C2 F23 109.0(5) . . ?
F21 C2 F22 106.0(5) . . ?
F23 C2 F22 105.8(5) . . ?
F21 C2 S2 113.1(4) . . ?
F23 C2 S2 111.8(4) . . ?
F22 C2 S2 110.7(4) . . ?
O32 S3 O33 116.7(2) . . ?
O32 S3 O31 113.9(2) . . ?
O33 S3 O31 112.6(2) . . ?
O32 S3 C3 105.0(2) . . ?
O33 S3 C3 102.9(2) . . ?
O31 S3 C3 103.8(2) . . ?
F32 C3 F31 108.6(5) . . ?
F32 C3 F33 106.9(5) . . ?
F31 C3 F33 107.1(4) . . ?
F32 C3 S3 112.7(4) . . ?
F31 C3 S3 111.7(4) . . ?
F33 C3 S3 109.6(4) . . ?
O43 S4 O41 118.8(3) . . ?
O43 S4 O42 112.5(3) . . ?
O41 S4 O42 113.1(3) . . ?
O43 S4 C4 104.3(3) . . ?
O41 S4 C4 105.6(3) . . ?
O42 S4 C4 99.9(3) . . ?
F42 C4 F43 108.8(5) . . ?
F42 C4 F41 104.4(5) . . ?
F43 C4 F41 108.0(5) . . ?
F42 C4 S4 112.6(4) . . ?
F43 C4 S4 112.0(4) . . ?
F41 C4 S4 110.7(4) . . ?
 
loop_
 _geom_hbond_atom_site_label_D
 _geom_hbond_atom_site_label_H
 _geom_hbond_atom_site_label_A
 _geom_hbond_distance_DH
 _geom_hbond_distance_HA
 _geom_hbond_distance_DA
 _geom_hbond_angle_DHA
 _geom_hbond_site_symmetry_A
O1 H1A O10  0.82 1.85 2.676(5) 177.2 6
O1 H1B O33  0.82 1.98 2.754(5) 157.0 6_565
O1 H1B S3  0.82 2.83 3.641(3) 166.3 6_565
O2 H2A O42  0.82 1.78 2.599(5) 174.5 6
O2 H2B O31  0.82 1.99 2.782(5) 163.1 6_565
O2 H2B O12  0.82 2.58 3.014(4) 114.8 .
O2 H2B S3  0.82 2.95 3.609(3) 139.7 6_565
O3 H3A O21  0.82 1.82 2.638(5) 177.6 6_556
O3 H3B O12  0.82 2.00 2.789(4) 162.6 6_566
O3 H3B O31  0.82 2.56 2.986(4) 113.6 .
O3 H3B S1  0.82 2.96 3.646(3) 143.3 6_566
O4 H4A O10  0.83 1.85 2.669(5) 173.0 .
O4 H4B O11  0.82 1.96 2.757(4) 163.0 6_566
O4 H4B S1  0.82 2.83 3.640(3) 167.0 6_566
O10 H1OA O23  0.85 1.92 2.774(6) 179.6 6_556
O10 H10B O43  0.85 2.14 2.987(7) 178.3 .
 
_diffrn_measured_fraction_theta_max    0.999
_diffrn_reflns_theta_full              26.37
_diffrn_measured_fraction_theta_full   0.998
_refine_diff_density_max    1.668
_refine_diff_density_min   -0.993
_refine_diff_density_rms    0.136

#====END
#========================================================
data_[Pd3(BCOPE)3H2](OTF)2
  
_audit_creation_method            SHELXL-97
_chemical_name_systematic
;
 ?
;
_chemical_name_common             ?
_chemical_melting_point           ?
_chemical_formula_moiety          
'C54 H96 P6 Pd3, C2 F6 O6 S2'
_chemical_formula_sum
 'C56 H96 F6 O6 P6 Pd3 S2'
_chemical_formula_weight          1548.47
_chemical_compound_source               'synthesis as described'
 
loop_
 _atom_type_symbol
 _atom_type_description
 _atom_type_scat_dispersion_real
 _atom_type_scat_dispersion_imag
 _atom_type_scat_source
 'C'  'C'   0.0033   0.0016
 'International Tables Vol C Tables 4.2.6.8 and 6.1.1.4'
 'H'  'H'   0.0000   0.0000
 'International Tables Vol C Tables 4.2.6.8 and 6.1.1.4'
 'O'  'O'   0.0106   0.0060
 'International Tables Vol C Tables 4.2.6.8 and 6.1.1.4'
 'F'  'F'   0.0171   0.0103
 'International Tables Vol C Tables 4.2.6.8 and 6.1.1.4'
 'P'  'P'   0.1023   0.0942
 'International Tables Vol C Tables 4.2.6.8 and 6.1.1.4'
 'S'  'S'   0.1246   0.1234
 'International Tables Vol C Tables 4.2.6.8 and 6.1.1.4'
 'Pd'  'Pd'  -0.9988   1.0072
 'International Tables Vol C Tables 4.2.6.8 and 6.1.1.4'
 
_symmetry_cell_setting                  trigonal
_symmetry_space_group_name_H-M          'P 63'
_symmetry_space_group_name_Hall         'P 6c'
_symmetry_Int_Tables_number             173
 
loop_
 _symmetry_equiv_pos_as_xyz
 'x, y, z'
 '-y, x-y, z'
 '-x+y, -x, z'
 '-x, -y, z+1/2'
 'y, -x+y, z+1/2'
 'x-y, x, z+1/2'
 
_cell_length_a                    23.452(3)
_cell_length_b                    23.452(3)
_cell_length_c                    10.6808(15)
_cell_angle_alpha                 90.00
_cell_angle_beta                  90.00
_cell_angle_gamma                 120.00
_cell_volume                      5087.4(11)
_cell_formula_units_Z             3
_cell_measurement_temperature     173(2)
_cell_measurement_reflns_used     8680
_cell_measurement_theta_min       2.1
_cell_measurement_theta_max       32.2
 
_exptl_crystal_description              needle
_exptl_crystal_colour                   Brown
_exptl_crystal_size_max                 0.62
_exptl_crystal_size_mid                 0.12
_exptl_crystal_size_min                 0.09
_exptl_crystal_density_meas       ?
_exptl_crystal_density_diffrn     1.759
_exptl_crystal_density_method     'not measured'
_exptl_crystal_F_000              2772
_exptl_absorpt_coefficient_mu     1.106
_exptl_absorpt_correction_type    Multi-scan
_exptl_absorpt_correction_T_min   0.411857
_exptl_absorpt_correction_T_max   0.862090  
_exptl_absorpt_process_details    'SADABS (Siemens, 1996)'
 
_exptl_special_details
;
One of the trinuclear Pd complex is fully disordered around the
0 0 z three fold axis whereas the second one is well defined and
located around 1/3 2/3 z (or 2/3 1/3 z). Owing to this disorder and
to a Flack parameter with value of 0.20(8), the occurence of possible 
twinning by merohedry (or pseudo-merohedry) has been considered. 
Attempt to solve and refine the structure in the two possible subgroups
trigonal P3 or monoclinic P21 didn't allow a better refinement.
Although, the structure could be solved in both these space groups,
one of the trinuclear Pd complex remained disordered. So the 
refinement in P6~3~ was used for the last cycles of refinement
considering a possible twin by inversion (racemic twin) to
explain the large value of the Flack's parameter.

Moreover, some residual electron density were difficult to modelize and 
therefore, the SQUEEZE function of PLATON (Spek, 2003) was used to 
eliminate the contribution of the electron density in the solvent region 
from the intensity data, and the solvent-free model was employed for the 
final refinement.PLATON estimated that the cavity within the cell
contains 83 electrons which may correspond to three solvent molecules
of ethanol as suggested by chemical analyses.

;
 
_diffrn_ambient_temperature       173(2)
_diffrn_radiation_wavelength      0.71073
_diffrn_radiation_type            MoK\a
_diffrn_radiation_source          'fine-focus sealed tube'
_diffrn_radiation_monochromator   graphite
_diffrn_measurement_device_type   'Bruker Smart 1000'
_diffrn_measurement_method        '\f and \w'
_diffrn_detector_area_resol_mean  ?
_diffrn_standards_number          ?
_diffrn_standards_interval_count  ?
_diffrn_standards_interval_time   ?
_diffrn_standards_decay_%         ?
_diffrn_reflns_number             26852
_diffrn_reflns_av_R_equivalents   0.0865
_diffrn_reflns_av_sigmaI/netI     0.0693
_diffrn_reflns_limit_h_min        -27
_diffrn_reflns_limit_h_max        27
_diffrn_reflns_limit_k_min        -26
_diffrn_reflns_limit_k_max        27
_diffrn_reflns_limit_l_min        -12
_diffrn_reflns_limit_l_max        11
_diffrn_reflns_theta_min          1.74
_diffrn_reflns_theta_max          24.99
_reflns_number_total              5829
_reflns_number_gt                 4832
_reflns_threshold_expression      I>2\s(I)
 
_computing_data_collection        'SMART (Bruker, 1998)'
_computing_cell_refinement        'SAINT (Bruker, 1998)'
_computing_data_reduction         SAINT
_computing_structure_solution     'SIR97 (Altomare et al., 1999)'
_computing_structure_refinement   'SHELXL-97 (Sheldrick, 1997)'
_computing_molecular_graphics     'ORTEP-3 for Windows (Farrugia, 1997)'
_computing_publication_material   SHELXL97
 
_refine_special_details
;
 Refinement of F^2^ against ALL reflections.  The weighted R-factor wR and
 goodness of fit S are based on F^2^, conventional R-factors R are based
 on F, with F set to zero for negative F^2^. The threshold expression of
 F^2^ > 2sigma(F^2^) is used only for calculating R-factors(gt) etc. and is
 not relevant to the choice of reflections for refinement.  R-factors based
 on F^2^ are statistically about twice as large as those based on F, and R-
 factors based on ALL data will be even larger.
;
 
_refine_ls_structure_factor_coef  Fsqd
_refine_ls_matrix_type            full
_refine_ls_weighting_scheme       calc
_refine_ls_weighting_details
 'calc w=1/[\s^2^(Fo^2^)+(0.0509P)^2^+64.3170P] where P=(Fo^2^+2Fc^2^)/3'
_atom_sites_solution_primary      direct
_atom_sites_solution_secondary    difmap
_atom_sites_solution_hydrogens    geom
_refine_ls_hydrogen_treatment     constr
_refine_ls_extinction_method      none
_refine_ls_extinction_coef        ?
_refine_ls_abs_structure_details
 'Flack H D (1983), Acta Cryst. A39, 876-881'
_refine_ls_abs_structure_Flack    0.20(8)
_refine_ls_number_reflns          5829
_refine_ls_number_parameters      452
_refine_ls_number_restraints      493
_refine_ls_R_factor_all           0.0888
_refine_ls_R_factor_gt            0.0752
_refine_ls_wR_factor_ref          0.1907
_refine_ls_wR_factor_gt           0.1853
_refine_ls_goodness_of_fit_ref    1.106
_refine_ls_restrained_S_all       1.071
_refine_ls_shift/su_max           0.048
_refine_ls_shift/su_mean          0.008
 
loop_
 _atom_site_label
 _atom_site_type_symbol
 _atom_site_fract_x
 _atom_site_fract_y
 _atom_site_fract_z
 _atom_site_U_iso_or_equiv
 _atom_site_adp_type
 _atom_site_occupancy
 _atom_site_symmetry_multiplicity
 _atom_site_calc_flag
 _atom_site_refinement_flags
 _atom_site_disorder_assembly
 _atom_site_disorder_group
Pd1 Pd 0.74668(3) 0.36655(4) 0.48903(13) 0.0264(2) Uani 1 1 d U . .
P1 P 0.83380(13) 0.37234(14) 0.5927(3) 0.0268(6) Uani 1 1 d DU . .
P2 P 0.82302(14) 0.46031(14) 0.3793(3) 0.0288(7) Uani 1 1 d DU . .
C1 C 0.9078(5) 0.4307(6) 0.5064(16) 0.047(3) Uani 1 1 d DU . .
H1A H 0.9466 0.4470 0.5623 0.057 Uiso 1 1 calc R . .
H1B H 0.9146 0.4076 0.4353 0.057 Uiso 1 1 calc R . .
C2 C 0.9032(5) 0.4885(6) 0.4572(15) 0.055(4) Uani 1 1 d DU . .
H2A H 0.9393 0.5135 0.3968 0.066 Uiso 1 1 calc R . .
H2B H 0.9082 0.5183 0.5273 0.066 Uiso 1 1 calc R . .
C111 C 0.8406(5) 0.3989(5) 0.7559(10) 0.037(2) Uani 1 1 d DU . .
H111 H 0.8382 0.4403 0.7563 0.044 Uiso 1 1 calc R . .
C112 C 0.7782(6) 0.3454(5) 0.8225(12) 0.040(3) Uani 1 1 d DU . .
H11A H 0.7392 0.3427 0.7808 0.048 Uiso 1 1 calc R . .
H11B H 0.7786 0.3596 0.9100 0.048 Uiso 1 1 calc R . .
C113 C 0.7701(7) 0.2756(6) 0.8244(12) 0.043(3) Uani 1 1 d DU . .
H11C H 0.8013 0.2754 0.8866 0.051 Uiso 1 1 calc R . .
H11D H 0.7251 0.2441 0.8539 0.051 Uiso 1 1 calc R . .
C114 C 0.7814(6) 0.2503(5) 0.6985(12) 0.032(3) Uani 1 1 d DU . .
H11E H 0.7420 0.2363 0.6453 0.039 Uiso 1 1 calc R . .
H11F H 0.7852 0.2108 0.7151 0.039 Uiso 1 1 calc R . .
C115 C 0.8429(4) 0.3005(5) 0.6241(11) 0.028(2) Uani 1 1 d DU . .
H115 H 0.8422 0.2800 0.5416 0.034 Uiso 1 1 calc R . .
C116 C 0.9111(5) 0.3228(5) 0.6857(11) 0.033(2) Uani 1 1 d DU . .
H11G H 0.9161 0.2837 0.6967 0.040 Uiso 1 1 calc R . .
H11H H 0.9460 0.3531 0.6275 0.040 Uiso 1 1 calc R . .
C117 C 0.9220(7) 0.3577(6) 0.8146(12) 0.042(3) Uani 1 1 d DU . .
H11I H 0.8934 0.3247 0.8774 0.050 Uiso 1 1 calc R . .
H11J H 0.9682 0.3748 0.8405 0.050 Uiso 1 1 calc R . .
C118 C 0.9076(6) 0.4154(6) 0.8161(13) 0.037(3) Uani 1 1 d DU . .
H11K H 0.9434 0.4533 0.7711 0.045 Uiso 1 1 calc R . .
H11L H 0.9081 0.4291 0.9040 0.045 Uiso 1 1 calc R . .
C211 C 0.8166(5) 0.5346(5) 0.3582(13) 0.037(2) Uani 1 1 d DU . .
H211 H 0.8115 0.5485 0.4440 0.044 Uiso 1 1 calc R . .
C212 C 0.8798(6) 0.5919(6) 0.3050(14) 0.042(3) Uani 1 1 d DU . .
H21A H 0.9165 0.6018 0.3630 0.050 Uiso 1 1 calc R . .
H21B H 0.8748 0.6314 0.3014 0.050 Uiso 1 1 calc R . .
C213 C 0.8984(6) 0.5789(6) 0.1715(16) 0.047(3) Uani 1 1 d U . .
H21C H 0.9434 0.6147 0.1514 0.057 Uiso 1 1 calc R . .
H21D H 0.8681 0.5813 0.1101 0.057 Uiso 1 1 calc R . .
C214 C 0.8959(6) 0.5098(6) 0.1536(14) 0.048(3) Uani 1 1 d DU . .
H21E H 0.8973 0.5017 0.0630 0.058 Uiso 1 1 calc R . .
H21F H 0.9356 0.5127 0.1926 0.058 Uiso 1 1 calc R . .
C215 C 0.8334(5) 0.4500(6) 0.2118(10) 0.041(3) Uani 1 1 d DU . .
H215 H 0.8392 0.4107 0.2038 0.049 Uiso 1 1 calc R . .
C216 C 0.7674(6) 0.4320(6) 0.1492(13) 0.044(3) Uani 1 1 d DU . .
H21G H 0.7322 0.3913 0.1886 0.052 Uiso 1 1 calc R . .
H21H H 0.7696 0.4222 0.0598 0.052 Uiso 1 1 calc R . .
C217 C 0.7478(6) 0.4866(7) 0.1579(13) 0.041(3) Uani 1 1 d U . .
H21I H 0.7767 0.5231 0.1011 0.049 Uiso 1 1 calc R . .
H21J H 0.7021 0.4680 0.1273 0.049 Uiso 1 1 calc R . .
C218 C 0.7523(6) 0.5150(6) 0.2896(15) 0.043(3) Uani 1 1 d DU . .
H21K H 0.7470 0.5542 0.2827 0.051 Uiso 1 1 calc R . .
H21L H 0.7153 0.4818 0.3406 0.051 Uiso 1 1 calc R . .
Pd2 Pd 0.93437(10) 0.00615(13) 0.2660(2) 0.0470(6) Uani 0.50 1 d PU A -1
P3 P 0.8351(3) -0.0456(3) 0.1604(8) 0.0380(16) Uani 0.50 1 d PDU A -1
P4 P 0.8933(3) 0.0615(4) 0.3769(8) 0.0362(16) Uani 0.50 1 d PDU A -1
C21 C 0.7782(10) -0.0283(13) 0.253(3) 0.059(7) Uani 0.50 1 d PDU A -1
H21M H 0.7417 -0.0336 0.1981 0.070 Uiso 0.50 1 calc PR A -1
H21N H 0.7589 -0.0606 0.3217 0.070 Uiso 0.50 1 calc PR A -1
C22 C 0.8126(10) 0.0401(13) 0.306(3) 0.057(7) Uani 0.50 1 d PDU A -1
H22A H 0.7842 0.0435 0.3712 0.068 Uiso 0.50 1 calc PR A -1
H22B H 0.8195 0.0720 0.2394 0.068 Uiso 0.50 1 calc PR A -1
C311 C 0.8402(11) -0.0192(12) -0.0034(18) 0.050(5) Uani 0.50 1 d PDU A -1
H311 H 0.8666 0.0299 -0.0058 0.060 Uiso 0.50 1 calc PR A -1
C312 C 0.8785(13) -0.0459(15) -0.071(3) 0.053(6) Uani 0.50 1 d PDU A -1
H31A H 0.8821 -0.0335 -0.1604 0.064 Uiso 0.50 1 calc PR A -1
H31B H 0.9236 -0.0249 -0.0360 0.064 Uiso 0.50 1 calc PR A -1
C313 C 0.848(2) -0.1188(19) -0.062(4) 0.066(8) Uani 0.50 1 d PU A -1
H31C H 0.8801 -0.1297 -0.0996 0.080 Uiso 0.50 1 calc PR A -1
H31D H 0.8093 -0.1380 -0.1173 0.080 Uiso 0.50 1 calc PR A -1
C314 C 0.8262(17) -0.1565(16) 0.060(3) 0.054(7) Uani 0.50 1 d PU A -1
H31E H 0.8651 -0.1470 0.1117 0.065 Uiso 0.50 1 calc PR A -1
H31F H 0.8012 -0.2044 0.0432 0.065 Uiso 0.50 1 calc PR A -1
C315 C 0.7790(13) -0.1344(8) 0.137(3) 0.047(6) Uani 0.50 1 d PDU A -1
H315 H 0.7681 -0.1565 0.2211 0.057 Uiso 0.50 1 calc PR A -1
C316 C 0.7158(15) -0.1550(15) 0.068(4) 0.046(7) Uani 0.50 1 d PDU A -1
H31G H 0.6813 -0.1625 0.1298 0.055 Uiso 0.50 1 calc PR A -1
H31H H 0.7022 -0.1977 0.0264 0.055 Uiso 0.50 1 calc PR A -1
C317 C 0.7173(14) -0.1050(15) -0.036(3) 0.036(7) Uani 0.50 1 d PU A -1
H31I H 0.7027 -0.1305 -0.1146 0.043 Uiso 0.50 1 calc PR A -1
H31J H 0.6822 -0.0954 -0.0119 0.043 Uiso 0.50 1 calc PR A -1
C318 C 0.7749(13) -0.0409(13) -0.069(3) 0.055(7) Uani 0.50 1 d PDU A -1
H31K H 0.7629 -0.0066 -0.0543 0.066 Uiso 0.50 1 calc PR A -1
H31L H 0.7824 -0.0415 -0.1602 0.066 Uiso 0.50 1 calc PR A -1
C411 C 0.8772(12) 0.0378(13) 0.5440(16) 0.045(5) Uani 0.50 1 d PDU A -1
H411 H 0.8528 -0.0112 0.5541 0.054 Uiso 0.50 1 calc PR A -1
C412 C 0.9471(12) 0.0689(13) 0.601(2) 0.050(6) Uani 0.50 1 d PDU A -1
H41A H 0.9423 0.0576 0.6907 0.060 Uiso 0.50 1 calc PR A -1
H41B H 0.9696 0.0472 0.5612 0.060 Uiso 0.50 1 calc PR A -1
C413 C 0.9918(13) 0.1417(12) 0.589(3) 0.049(6) Uani 0.50 1 d PDU A -1
H41C H 0.9745 0.1627 0.6467 0.059 Uiso 0.50 1 calc PR A -1
H41D H 1.0352 0.1517 0.6229 0.059 Uiso 0.50 1 calc PR A -1
C414 C 1.0040(12) 0.1759(15) 0.467(2) 0.047(6) Uani 0.50 1 d PDU A -1
H41E H 1.0343 0.1674 0.4164 0.056 Uiso 0.50 1 calc PR A -1
H41F H 1.0250 0.2240 0.4807 0.056 Uiso 0.50 1 calc PR A -1
C415 C 0.9398(11) 0.1517(8) 0.397(3) 0.047(5) Uani 0.50 1 d PDU A -1
H415 H 0.9515 0.1712 0.3112 0.056 Uiso 0.50 1 calc PR A -1
C416 C 0.8823(18) 0.1591(17) 0.441(3) 0.048(7) Uani 0.50 1 d PDU A -1
H41G H 0.8429 0.1295 0.3909 0.058 Uiso 0.50 1 calc PR A -1
H41H H 0.8925 0.2049 0.4255 0.058 Uiso 0.50 1 calc PR A -1
C417 C 0.8665(13) 0.1428(12) 0.582(3) 0.040(7) Uani 0.50 1 d PDU A -1
H41I H 0.9069 0.1694 0.6318 0.048 Uiso 0.50 1 calc PR A -1
H41J H 0.8333 0.1547 0.6082 0.048 Uiso 0.50 1 calc PR A -1
C418 C 0.8399(14) 0.0690(11) 0.607(3) 0.049(6) Uani 0.50 1 d PDU A -1
H41K H 0.7934 0.0444 0.5799 0.059 Uiso 0.50 1 calc PR A -1
H41L H 0.8405 0.0629 0.6989 0.059 Uiso 0.50 1 calc PR A -1
S1 S 0.6449(2) 0.6209(2) 0.1808(5) 0.0630(11) Uani 1 1 d DU . .
F1 F 0.6209(9) 0.6376(7) 0.4116(11) 0.169(7) Uani 1 1 d DU . .
F2 F 0.5709(5) 0.6618(6) 0.2813(16) 0.144(6) Uani 1 1 d DU . .
F3 F 0.6693(5) 0.7254(4) 0.3143(11) 0.093(3) Uani 1 1 d DU . .
O1 O 0.7042(7) 0.6282(8) 0.2208(17) 0.154(8) Uani 1 1 d DU . .
O2 O 0.6507(7) 0.6606(7) 0.0765(12) 0.107(5) Uani 1 1 d DU . .
O3 O 0.5900(7) 0.5579(5) 0.1740(14) 0.101(5) Uani 1 1 d DU . .
C19 C 0.6265(6) 0.6622(6) 0.2988(14) 0.063(3) Uani 1 1 d DU . .
 
loop_
 _atom_site_aniso_label
 _atom_site_aniso_U_11
 _atom_site_aniso_U_22
 _atom_site_aniso_U_33
 _atom_site_aniso_U_23
 _atom_site_aniso_U_13
 _atom_site_aniso_U_12
Pd1 0.0179(4) 0.0238(4) 0.0361(4) 0.0077(5) -0.0014(5) 0.0093(3)
P1 0.0188(14) 0.0207(14) 0.0366(17) 0.0047(13) -0.0049(13) 0.0066(12)
P2 0.0225(15) 0.0255(15) 0.0376(17) 0.0078(14) 0.0017(13) 0.0115(12)
C1 0.019(4) 0.044(6) 0.067(9) 0.030(7) 0.005(6) 0.008(5)
C2 0.025(5) 0.036(6) 0.082(10) 0.029(6) -0.002(6) 0.000(5)
C111 0.047(6) 0.036(6) 0.045(6) -0.009(5) -0.012(5) 0.033(5)
C112 0.039(6) 0.040(6) 0.038(6) -0.012(5) -0.009(5) 0.017(5)
C113 0.039(7) 0.043(6) 0.039(7) 0.001(6) -0.002(6) 0.015(6)
C114 0.028(5) 0.023(5) 0.046(7) 0.006(5) 0.004(5) 0.014(5)
C115 0.026(5) 0.025(5) 0.037(6) -0.004(4) -0.003(4) 0.015(4)
C116 0.033(5) 0.019(5) 0.051(7) 0.009(5) -0.003(5) 0.016(5)
C117 0.037(7) 0.041(7) 0.052(7) -0.007(6) -0.027(6) 0.023(6)
C118 0.039(6) 0.032(6) 0.039(7) -0.001(5) -0.011(5) 0.017(5)
C211 0.037(6) 0.025(5) 0.045(7) 0.013(5) 0.015(5) 0.013(5)
C212 0.041(6) 0.019(5) 0.056(8) 0.009(5) 0.014(6) 0.008(5)
C213 0.025(6) 0.033(6) 0.078(9) 0.015(7) 0.030(7) 0.010(6)
C214 0.046(6) 0.046(7) 0.055(8) 0.010(6) 0.028(6) 0.025(6)
C215 0.038(6) 0.036(6) 0.051(6) 0.016(5) 0.023(5) 0.020(5)
C216 0.051(6) 0.036(7) 0.040(7) -0.006(6) -0.002(6) 0.019(6)
C217 0.029(6) 0.041(7) 0.051(7) 0.014(6) 0.000(6) 0.016(5)
C218 0.045(6) 0.026(6) 0.055(8) 0.018(5) 0.012(6) 0.016(5)
Pd2 0.0390(11) 0.0874(17) 0.0375(12) -0.0010(12) 0.0011(10) 0.0488(12)
P3 0.028(3) 0.034(4) 0.057(4) -0.011(3) -0.007(3) 0.019(3)
P4 0.024(3) 0.036(4) 0.044(4) -0.006(3) 0.001(3) 0.012(3)
C21 0.035(9) 0.068(15) 0.091(16) -0.043(14) -0.028(11) 0.038(11)
C22 0.030(10) 0.069(15) 0.083(16) -0.041(14) -0.017(11) 0.033(10)
C311 0.039(10) 0.028(11) 0.069(10) 0.017(11) -0.019(8) 0.006(9)
C312 0.032(12) 0.060(12) 0.038(11) 0.006(11) -0.005(10) 0.000(11)
C313 0.059(19) 0.054(13) 0.058(16) -0.022(12) 0.018(14) 0.007(14)
C314 0.062(15) 0.042(11) 0.073(17) 0.000(10) 0.006(13) 0.036(13)
C315 0.056(12) 0.025(8) 0.059(16) 0.010(9) 0.022(9) 0.018(7)
C316 0.033(10) 0.014(13) 0.074(18) 0.001(10) 0.024(10) -0.001(9)
C317 0.025(10) 0.023(12) 0.064(18) -0.015(11) 0.013(10) 0.015(8)
C318 0.044(11) 0.019(11) 0.087(17) 0.015(11) -0.027(11) 0.004(10)
C411 0.059(13) 0.029(11) 0.044(9) -0.007(9) 0.012(10) 0.019(10)
C412 0.056(12) 0.057(12) 0.024(10) -0.013(11) 0.011(9) 0.018(11)
C413 0.039(13) 0.059(12) 0.055(14) 0.010(13) -0.001(12) 0.028(10)
C414 0.042(11) 0.054(12) 0.030(14) -0.012(10) -0.005(10) 0.013(10)
C415 0.040(11) 0.043(8) 0.036(13) -0.003(9) -0.007(8) 0.004(9)
C416 0.037(14) 0.008(13) 0.084(18) -0.003(12) -0.019(13) 0.000(13)
C417 0.009(14) 0.016(11) 0.084(17) -0.011(14) -0.002(13) -0.002(11)
C418 0.049(14) 0.016(11) 0.061(15) -0.013(10) 0.023(13) 0.000(11)
S1 0.060(2) 0.060(2) 0.077(3) -0.024(2) -0.013(2) 0.036(2)
F1 0.30(2) 0.127(11) 0.084(8) 0.017(8) 0.059(10) 0.107(14)
F2 0.052(6) 0.116(10) 0.272(17) -0.102(11) -0.017(9) 0.048(6)
F3 0.078(6) 0.056(5) 0.118(9) -0.037(5) -0.007(6) 0.015(5)
O1 0.123(10) 0.215(18) 0.189(18) -0.102(15) -0.065(12) 0.134(12)
O2 0.125(12) 0.088(9) 0.058(7) -0.009(6) 0.003(8) 0.016(8)
O3 0.115(9) 0.052(6) 0.123(12) -0.024(6) 0.018(9) 0.033(6)
C19 0.068(9) 0.048(7) 0.071(8) -0.012(7) 0.000(8) 0.026(7)
 
_geom_special_details
;
 All esds (except the esd in the dihedral angle between two l.s. planes)
 are estimated using the full covariance matrix.  The cell esds are taken
 into account individually in the estimation of esds in distances, angles
 and torsion angles; correlations between esds in cell parameters are only
 used when they are defined by crystal symmetry.  An approximate (isotropic)
 treatment of cell esds is used for estimating esds involving l.s. planes.
;
 
loop_
 _geom_bond_atom_site_label_1
 _geom_bond_atom_site_label_2
 _geom_bond_distance
 _geom_bond_site_symmetry_2
 _geom_bond_publ_flag
Pd1 P1 2.267(3) . ?
Pd1 P2 2.340(3) . ?
Pd1 Pd1 2.8280(12) 2_655 ?
Pd1 Pd1 2.8280(12) 3_665 ?
P1 C1 1.833(10) . ?
P1 C115 1.832(9) . ?
P1 C111 1.831(10) . ?
P2 C211 1.837(10) . ?
P2 C215 1.838(11) . ?
P2 C2 1.849(11) . ?
C1 C2 1.509(16) . ?
C111 C112 1.543(12) . ?
C111 C118 1.556(11) . ?
C112 C113 1.552(13) . ?
C113 C114 1.545(13) . ?
C114 C115 1.550(12) . ?
C115 C116 1.557(11) . ?
C116 C117 1.557(13) . ?
C117 C118 1.549(12) . ?
C211 C212 1.527(13) . ?
C211 C218 1.526(14) . ?
C212 C213 1.57(2) . ?
C213 C214 1.604(18) . ?
C214 C215 1.564(12) . ?
C215 C216 1.539(12) . ?
C216 C217 1.564(18) . ?
C217 C218 1.54(2) . ?
Pd2 P4 2.296(8) . ?
Pd2 P3 2.310(7) . ?
P3 C315 1.840(14) . ?
P3 C311 1.839(15) . ?
P3 C21 1.861(16) . ?
P4 C415 1.846(15) . ?
P4 C411 1.851(15) . ?
P4 C22 1.857(15) . ?
C21 C22 1.50(2) . ?
C311 C312 1.51(2) . ?
C311 C318 1.52(2) . ?
C312 C313 1.49(5) . ?
C313 C314 1.51(5) . ?
C314 C315 1.66(4) . ?
C315 C316 1.51(2) . ?
C316 C317 1.60(4) . ?
C317 C318 1.48(4) . ?
C411 C412 1.546(15) . ?
C411 C418 1.548(15) . ?
C412 C413 1.50(3) . ?
C413 C414 1.49(3) . ?
C414 C415 1.51(2) . ?
C415 C416 1.52(2) . ?
C416 C417 1.552(17) . ?
C417 C418 1.543(16) . ?
S1 O1 1.382(12) . ?
S1 O3 1.394(11) . ?
S1 O2 1.413(12) . ?
S1 C19 1.769(17) . ?
F1 C19 1.314(13) . ?
F2 C19 1.312(13) . ?
F3 C19 1.319(13) . ?
 
loop_
 _geom_angle_atom_site_label_1
 _geom_angle_atom_site_label_2
 _geom_angle_atom_site_label_3
 _geom_angle
 _geom_angle_site_symmetry_1
 _geom_angle_site_symmetry_3
 _geom_angle_publ_flag
P1 Pd1 P2 86.85(11) . . ?
P1 Pd1 Pd1 149.54(9) . 2_655 ?
P2 Pd1 Pd1 102.39(8) . 2_655 ?
P1 Pd1 Pd1 123.31(8) . 3_665 ?
P2 Pd1 Pd1 146.46(8) . 3_665 ?
Pd1 Pd1 Pd1 60.0 2_655 3_665 ?
C1 P1 C115 106.0(5) . . ?
C1 P1 C111 109.6(7) . . ?
C115 P1 C111 96.2(5) . . ?
C1 P1 Pd1 106.7(4) . . ?
C115 P1 Pd1 123.4(3) . . ?
C111 P1 Pd1 114.1(3) . . ?
C211 P2 C215 94.8(6) . . ?
C211 P2 C2 105.4(6) . . ?
C215 P2 C2 107.9(6) . . ?
C211 P2 Pd1 124.5(4) . . ?
C215 P2 Pd1 116.9(4) . . ?
C2 P2 Pd1 105.9(4) . . ?
C2 C1 P1 112.2(8) . . ?
C1 C2 P2 110.6(8) . . ?
C112 C111 C118 116.2(10) . . ?
C112 C111 P1 106.0(7) . . ?
C118 C111 P1 112.6(8) . . ?
C111 C112 C113 115.4(10) . . ?
C114 C113 C112 116.1(11) . . ?
C113 C114 C115 115.3(10) . . ?
C114 C115 C116 116.6(10) . . ?
C114 C115 P1 107.5(7) . . ?
C116 C115 P1 109.9(7) . . ?
C117 C116 C115 114.9(10) . . ?
C118 C117 C116 114.8(10) . . ?
C117 C118 C111 114.3(9) . . ?
C212 C211 C218 117.7(11) . . ?
C212 C211 P2 112.2(8) . . ?
C218 C211 P2 108.0(8) . . ?
C211 C212 C213 114.1(11) . . ?
C212 C213 C214 115.7(11) . . ?
C215 C214 C213 113.7(10) . . ?
C216 C215 C214 115.9(11) . . ?
C216 C215 P2 106.1(8) . . ?
C214 C215 P2 113.3(9) . . ?
C215 C216 C217 114.6(10) . . ?
C218 C217 C216 115.1(11) . . ?
C211 C218 C217 114.4(11) . . ?
P4 Pd2 P3 87.2(3) . . ?
C315 P3 C311 98.2(15) . . ?
C315 P3 C21 97.6(13) . . ?
C311 P3 C21 111.3(14) . . ?
C315 P3 Pd2 128.5(11) . . ?
C311 P3 Pd2 114.1(8) . . ?
C21 P3 Pd2 105.7(8) . . ?
C415 P4 C411 98.5(13) . . ?
C415 P4 C22 107.2(12) . . ?
C411 P4 C22 106.4(14) . . ?
C415 P4 Pd2 122.3(10) . . ?
C411 P4 Pd2 114.1(8) . . ?
C22 P4 Pd2 107.3(8) . . ?
C22 C21 P3 112.0(16) . . ?
C21 C22 P4 112.0(16) . . ?
C312 C311 C318 110(2) . . ?
C312 C311 P3 105.5(16) . . ?
C318 C311 P3 116.2(18) . . ?
C313 C312 C311 114(2) . . ?
C312 C313 C314 124(3) . . ?
C313 C314 C315 109(3) . . ?
C316 C315 C314 111(3) . . ?
C316 C315 P3 117(2) . . ?
C314 C315 P3 102.0(18) . . ?
C315 C316 C317 117(3) . . ?
C318 C317 C316 126(3) . . ?
C317 C318 C311 119(2) . . ?
C412 C411 C418 109(2) . . ?
C412 C411 P4 103.1(16) . . ?
C418 C411 P4 111.0(19) . . ?
C413 C412 C411 119(2) . . ?
C414 C413 C412 121(3) . . ?
C413 C414 C415 110(2) . . ?
C416 C415 C414 125(3) . . ?
C416 C415 P4 96.7(17) . . ?
C414 C415 P4 113.2(17) . . ?
C415 C416 C417 113(3) . . ?
C418 C417 C416 111(3) . . ?
C417 C418 C411 117(2) . . ?
O1 S1 O3 119.0(8) . . ?
O1 S1 O2 113.7(9) . . ?
O3 S1 O2 113.1(8) . . ?
O1 S1 C19 102.6(8) . . ?
O3 S1 C19 105.6(7) . . ?
O2 S1 C19 99.9(8) . . ?
F1 C19 F2 104.3(13) . . ?
F1 C19 F3 103.4(12) . . ?
F2 C19 F3 102.8(11) . . ?
F1 C19 S1 114.2(10) . . ?
F2 C19 S1 114.0(10) . . ?
F3 C19 S1 116.6(10) . . ?
 
_diffrn_measured_fraction_theta_max    1.000
_diffrn_reflns_theta_full              24.99
_diffrn_measured_fraction_theta_full   1.000
_refine_diff_density_max    1.109
_refine_diff_density_min   -1.263
_refine_diff_density_rms    0.160

#====END
